# Supplementary material for: Synthesis and conformational analysis of pyran inter-halide analogues of ᴅ-talose
Source: publisher site journal article supplement (doi:10.3762/bjoc.20.208), 2024-09-27
Supplement: Additional file 1 [file 1860-5397-20-208-S1.pdf]

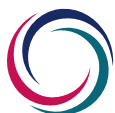

## Supporting Information

for

### Synthesis and conformational analysis of pyran inter-halide analogues of D-talose

Olivier Lessard, Mathilde Grosset-Magagne, Paul A. Johnson and Denis Giguère

*Beilstein J. Org. Chem.* **2024**, *20*, 2442–2454. [doi:10.3762/bjoc.20.208](https://doi.org/10.3762/bjoc.20.208)

### Experimental and analytical data, crystal structure determination and NMR spectra

## Table of contents

|      |                                                                                          |     |
|------|------------------------------------------------------------------------------------------|-----|
| I.   | Experimental section.....                                                                | S2  |
| II.  | Comparison of $^{19}\text{F}$ resonances of halogenated talose and allose analogues..... | S6  |
| III. | Crystal structure determination.....                                                     | S7  |
| IV.  | Crystal packing.....                                                                     | S11 |
| V.   | Density functional theory calculations.....                                              | S13 |
| VI.  | NMR spectra of compounds.....                                                            | S30 |
| VII. | References.....                                                                          | S38 |

## I. Experimental section

### General methods

All reactions were carried out under an argon atmosphere with dry solvents under anhydrous conditions, unless otherwise noted. Dry dichloromethane ( $\text{CH}_2\text{Cl}_2$ ) was obtained by passing commercially available pre-dried, oxygen-free formulations through activated alumina columns using a Vacuum Atmospheres Inc. Solvent Purification System. Yields refer to chromatographically and spectroscopically ( $^1\text{H}$  NMR) homogeneous materials, unless otherwise stated. Reagents were purchased at the highest commercial quality available and used without further purification, unless otherwise stated. Reactions were monitored by thin-layer chromatography (TLC) carried out on 0.25 mm E. Merck silica gel plates (60F-254) using UV light as visualizing agent and charring with a  $\text{KMnO}_4$  solution (1.5 g of  $\text{KMnO}_4$ , 10 g  $\text{K}_2\text{CO}_3$ , and 1.25 mL 10%  $\text{NaOH}$  in 200 mL of water), or a phenol solution (3 g phenol, 5 mL conc.  $\text{H}_2\text{SO}_4$  in 95 mL of EtOH), followed by heating with a heatgun as developing agents. SiliaFlash<sup>®</sup> P60 (particle size 40–63  $\mu\text{m}$ , 230–400 mesh) was used for flash column chromatography. NMR spectra were recorded on an Agilent DD2 spectrometer (at 500 MHz for  $^1\text{H}$ , 470 MHz for  $^{19}\text{F}$ , and 126 MHz for  $^{13}\text{C}$ ) and calibrated using residual undeuterated solvent peaks ( $\text{CDCl}_3$   $^1\text{H}$   $\delta = 7.26$  ppm,  $^{13}\text{C}$   $\delta = 77.16$  ppm; acetone- $d_6$ :  $^1\text{H}$   $\delta = 2.05$  ppm,  $^{13}\text{C}$   $\delta = 29.84$  ppm) as an internal reference. Coupling constants ( $J$ ) are reported in Hertz (Hz), and the following abbreviations were used to designate multiplicities: s = singlet, d = doublet, t = triplet, q = quartet, p = quintet, m = multiplet, br = broad. Assignments of NMR signals were made by homonuclear (COSY) and heteronuclear (HSQC, HMBC, and  $^{19}\text{F}$  gc2HSQC) two-dimensional correlation spectroscopy. Infrared (IR) spectra were recorded using an ABB Bomem MB-Series Arid Zone FTIR MB-155 Spectrometer, with a ZnSe crystal plate. The absorptions are given in wavenumbers ( $\text{cm}^{-1}$ ). High-resolution mass spectra (HRMS) were measured with an Agilent 6210 LC Time of Flight mass spectrometer in electrospray mode (ESI). Either protonated molecular ions  $[\text{M} + n\text{H}]^{n+}$ , sodium adducts  $[\text{M} + \text{Na}]^+$ , ammonium adducts  $[\text{M} + \text{NH}_4]^+$  or deprotonated molecular ions  $[\text{M} - n\text{H}]^{n-}$  were used for empirical formula confirmation. Optical rotations were recorded on a JASCO DIP-360 digital polarimeter at 589 nm and are reported in units of  $10^{-1}$  ( $\text{deg cm}^2 \text{g}^{-1}$ ). Melting points were measured on a Stanford Research System OptiMelt MPA100 151 automated melting point apparatus.

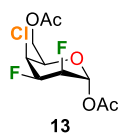

**1,6-Di-O-acetyl-4-chloro-2,3,4-trideoxy-2,3-difluoro- $\alpha$ -D-talopyranose (13).** In a manner similar to Denavit et al. [1], to a stirred solution of 1,6-anhydro-2,3-dideoxy-2,3-difluoro- $\beta$ -D-mannopyranose **5** (45.4 mg, 0.2733 mmol) in  $\text{CH}_2\text{Cl}_2$  (1.4 mL, 0.2 M) at 0  $^\circ\text{C}$ , were added pyridine (66.4  $\mu\text{L}$ ,

0.8199 mmol, 3 equiv) and  $\text{Tf}_2\text{O}$  (69.0  $\mu\text{L}$ , 0.4099 mmol, 1.5 equiv). The mixture was stirred at room temperature for 30 min and then quenched with water (3 mL). The mixture

was extracted with CH<sub>2</sub>Cl<sub>2</sub> (3 × 5 mL), and the combined organic phases were successively washed with an aqueous 1 M HCl solution (5 mL) and brine (5 mL). The organic solution was dried over MgSO<sub>4</sub>, filtered, and concentrated under reduced pressure. The crude triflate **7** was used for the next step without further purification. To a stirred solution of the crude triflate **7** in anhydrous acetonitrile (2.7 mL, 0.1 M) was added tetrabutylammonium chloride (227.9 mg, 0.8199 mmol, 3 equiv). The mixture was stirred at 65 °C for 6 days. The volatiles were removed under reduced pressure and the crude was dissolved in CH<sub>2</sub>Cl<sub>2</sub> (2.7 mL, 0.1 M). The mixture cooled to 0 °C and Ac<sub>2</sub>O (0.76 mL, 8.199 mmol, 30 equiv) and H<sub>2</sub>SO<sub>4</sub> (0.15 mL, 2.733 mmol, 10 equiv) were added. The mixture was stirred at room temperature for 18 h, then cooled to 0 °C. Sodium acetate (450 mg, 5.466 mmol, 20 equiv) was added and the mixture was stirred for an additional 20 min. Water (3 mL) was added and the mixture was extracted with CH<sub>2</sub>Cl<sub>2</sub> (3 × 5 mL). The combined organic phases were successively washed with a saturated aqueous NaHCO<sub>3</sub> solution (5 mL) and brine (5 mL). The organic solution was dried over MgSO<sub>4</sub>, filtered, and concentrated under reduced pressure. The crude residue was purified by flash column chromatography (silica gel, EtOAc/Hexanes, 1:4 → 1:1) to give **13** (α/β, >20:1) as a white solid (22.6 mg, 0.07884 mmol, 29% over 3 steps). The resulting product was recrystallized from acetone/heptane to give colorless crystals. R<sub>f</sub> = 0.35 (silica, EtOAc/hexanes 1:1); m.p. = 153 – 162 °C; [α]<sub>D</sub><sup>25</sup> = 89.5 (c 0.5, CHCl<sub>3</sub>); IR (ATR, diamond crystal) ν 3015, 2932, 1759, 1732, 1242, 1024, 978 cm<sup>-1</sup>; <sup>1</sup>H NMR (500 MHz, CDCl<sub>3</sub>) δ 6.37 (ddd, <sup>3</sup>J<sub>H1-F2</sub> = 8.0 Hz, <sup>3</sup>J<sub>H1-H2</sub> = 5.5 Hz, <sup>4</sup>J<sub>H1-F3</sub> = 1.9 Hz, 1H, H1), 4.95 (ddt, <sup>2</sup>J<sub>H3-F3</sub> = 43.2 Hz, <sup>3</sup>J<sub>H3-F2</sub> = 26.4 Hz, <sup>3</sup>J<sub>H3-H2</sub> = <sup>3</sup>J<sub>H3-H4</sub> = 3.6 Hz, 1H, H3), 4.74 (dddd, <sup>2</sup>J<sub>H2-F2</sub> = 48.7 Hz, <sup>3</sup>J<sub>H2-H1</sub> = 5.5 Hz, <sup>3</sup>J<sub>H2-H3</sub> = 3.5 Hz, <sup>3</sup>J<sub>H2-F3</sub> = 2.0 Hz, <sup>4</sup>J<sub>H2-H4</sub> = 1.0 Hz, 1H, H2), 4.44 (ddd, <sup>3</sup>J<sub>H4-F3</sub> = 4.3 Hz, <sup>3</sup>J<sub>H4-F3</sub> = 3.6 Hz, <sup>4</sup>J<sub>H4-H2</sub> = 1.0 Hz, 1H, H4), 4.41 – 4.29 (m, 3H, H5, H6a, H6b), 2.14 (s, 3H, COCH<sub>3</sub>), 2.09 (s, 3H, COCH<sub>3</sub>) ppm; <sup>13</sup>C {<sup>1</sup>H} NMR (126 MHz, CDCl<sub>3</sub>) δ 170.65 (1C, COCH<sub>3</sub>), 167.80 (1C, COCH<sub>3</sub>), 91.20 (dd, <sup>1</sup>J<sub>C1-F2</sub> = 32.3 Hz, <sup>3</sup>J<sub>C1-F3</sub> = 6.9 Hz, 1C, C1), 84.24 (dd, <sup>1</sup>J<sub>C2-F2</sub> = 190.9 Hz, <sup>2</sup>J<sub>C2-F3</sub> = 17.0 Hz, 1C, C2), 83.88 (dd, <sup>1</sup>J<sub>C3-F3</sub> = 197.7 Hz, <sup>2</sup>J<sub>C3-F2</sub> = 16.0 Hz, 1C, C3), 69.28 (d, <sup>3</sup>J<sub>C5-F3</sub> = 4.2 Hz, 1C, C5), 63.08 (d, <sup>4</sup>J<sub>C6-F3</sub> = 3.3 Hz, C6), 54.19 (d, <sup>2</sup>J<sub>C4-F3</sub> = 18.3 Hz, 1C, C4), 20.89 (1C, COCH<sub>3</sub>), 20.87 (1C, COCH<sub>3</sub>) ppm; <sup>19</sup>F NMR (470 MHz, CDCl<sub>3</sub>) δ -197.95 (ddq, <sup>2</sup>J<sub>F3-H3</sub> = 43.2 Hz, <sup>3</sup>J<sub>F3-F2</sub> = 14.8 Hz, <sup>3</sup>J<sub>F3-H4</sub> = 4.3 Hz, <sup>3</sup>J<sub>F3-H2</sub> = 2.0 Hz, <sup>4</sup>J<sub>F3-H1</sub> = 1.9 Hz, 1F, F3), -202.42 (dddd, <sup>2</sup>J<sub>F2-H3</sub> = 49.5 Hz, <sup>3</sup>J<sub>F2-H3</sub> = 26.5 Hz, <sup>3</sup>J<sub>F2-F3</sub> = 14.8 Hz, <sup>3</sup>J<sub>F2-H1</sub> = 8.5 Hz, 1F, F2) ppm; HRMS calcd for C<sub>10</sub>H<sub>17</sub>ClF<sub>2</sub>NO<sub>5</sub><sup>+</sup> [M + NH<sub>4</sub>]<sup>+</sup> 304.0758 found 304.0759.

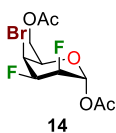

**1,6-Di-O-acetyl-4-bromo-2,3,4-trideoxy-2,3-difluoro-α-D-talopyranose**

**(14).** In a manner similar to Denavit et al. [1], to a stirred solution of 1,6-anhydro-2,3-dideoxy-2,3-difluoro-β-D-mannopyranose **5** (40.1 mg, 0.2414 mmol) in CH<sub>2</sub>Cl<sub>2</sub> (1.2 mL, 0.2 M) at 0 °C, were added pyridine (59.0 μL, 0.7242 mmol, 3 equiv) and Tf<sub>2</sub>O (61.0 μL, 0.3621 mmol, 1.5 equiv). The mixture was

stirred at room temperature for 30 min and then quenched with water (3 mL). The mixture was extracted with CH<sub>2</sub>Cl<sub>2</sub> (3 × 5 mL), and the combined organic phases were successively washed with an aqueous 1 M HCl solution (5 mL) and brine (5 mL). The organic solution was dried over MgSO<sub>4</sub>, filtered, and concentrated under reduced pressure. The crude triflate **7** was used for the next step without further purification. To a stirred solution of the crude triflate **7** in anhydrous acetonitrile (2.4 mL, 0.1 M) was added tetrabutylammonium bromide (233.5 mg, 0.7242 mmol, 3 equiv). The mixture was stirred at 65 °C for 4 days. The volatiles were removed under reduced pressure and the crude was dissolved in CH<sub>2</sub>Cl<sub>2</sub> (2.4 mL, 0.1 M). The mixture cooled to 0 °C and Ac<sub>2</sub>O (0.68 mL, 7.242 mmol, 30 equiv) and H<sub>2</sub>SO<sub>4</sub> (0.13 mL, 2.414 mmol, 10 equiv) were added. The mixture was stirred at room temperature for 17 h, then cooled to 0 °C. Sodium acetate (396 mg, 4.828 mmol, 20 equiv) was added and the mixture was stirred for an additional 20 min. Water (3 mL) was added and the mixture was extracted with CH<sub>2</sub>Cl<sub>2</sub> (3 × 5 mL). The combined organic phases were successively washed with a saturated aqueous NaHCO<sub>3</sub> solution (5 mL) and brine (5 mL). The organic solution was dried over MgSO<sub>4</sub>, filtered, and concentrated under reduced pressure. The crude residue was purified by flash column chromatography (silica gel, EtOAc/Hexanes, 3:7 → 1:1) to give **14** (α/β, >20:1) as a white solid (54.1 mg, 0.1634 mmol, 68% over 3 steps). The resulting product was recrystallized from acetone/heptane to give colorless crystals. *R*<sub>f</sub> = 0.38 (silica, EtOAc/hexanes 1:1); m.p. = 164 – 176 °C; [α]<sub>D</sub><sup>25</sup> = 73.2 (*c* 0.4, CHCl<sub>3</sub>); IR (ATR, diamond crystal)  $\nu$  3016, 2924, 1759, 1728, 1244, 1213, 972 cm<sup>-1</sup>; <sup>1</sup>H NMR (500 MHz, CDCl<sub>3</sub>)  $\delta$  6.36 (ddd, <sup>3</sup>*J*<sub>H1-F2</sub> = 7.9 Hz, <sup>3</sup>*J*<sub>H1-H2</sub> = 5.4 Hz, <sup>4</sup>*J*<sub>H1-F3</sub> = 2.2 Hz, 1H, H1), 4.93 (dddd, <sup>2</sup>*J*<sub>H3-F3</sub> = 43.7 Hz, <sup>3</sup>*J*<sub>H3-F2</sub> = 25.7 Hz, <sup>3</sup>*J*<sub>H3-H4</sub> = 4.4 Hz, <sup>3</sup>*J*<sub>H3-H2</sub> = 3.1 Hz, 1H, H3), 4.74 (dddd, <sup>2</sup>*J*<sub>H2-F2</sub> = 48.7 Hz, <sup>3</sup>*J*<sub>H2-H1</sub> = 6.2 Hz, <sup>3</sup>*J*<sub>H2-H3</sub> = 3.2 Hz, <sup>3</sup>*J*<sub>H2-F3</sub> = 2.2 Hz, 1.1 Hz, 1H, H2), 4.43 (ddt, <sup>3</sup>*J*<sub>H4-F3</sub> = 4.7 Hz, <sup>3</sup>*J*<sub>H4-H3</sub> = 4.4 Hz, <sup>3</sup>*J*<sub>H4-H5</sub> = <sup>4</sup>*J*<sub>H4-H6a</sub> = 1.5 Hz, 1H, H4), 4.39 (ddd, <sup>2</sup>*J*<sub>H6a-H6b</sub> = 11.6 Hz, <sup>3</sup>*J*<sub>H6a-H5</sub> = 6.9 Hz, <sup>4</sup>*J*<sub>H6a-H4</sub> = 1.4 Hz, 1H, H6a), 4.31 (dd, <sup>2</sup>*J*<sub>H6b-H6a</sub> = 11.6 Hz, <sup>3</sup>*J*<sub>H6b-H5</sub> = 5.4 Hz, 1H, H5), 4.18 (dddd, <sup>3</sup>*J*<sub>H5-H6a</sub> = 6.8 Hz, <sup>3</sup>*J*<sub>H5-H6b</sub> = 5.4 Hz, 1.6 Hz, <sup>3</sup>*J*<sub>H5-H4</sub> = 1.5 Hz, 1H, H5), 2.14 (s, 3H, COCH<sub>3</sub>), 2.09 (s, 3H, COCH<sub>3</sub>) ppm; <sup>13</sup>C {<sup>1</sup>H} NMR (126 MHz, CDCl<sub>3</sub>)  $\delta$  170.65 (1C, COCH<sub>3</sub>), 167.80 (1C, COCH<sub>3</sub>), 91.12 (dd, <sup>1</sup>*J*<sub>C1-F2</sub> = 32.4 Hz, <sup>3</sup>*J*<sub>C1-F3</sub> = 6.7 Hz, 1C, C1), 84.26 (dd, <sup>1</sup>*J*<sub>C2-F2</sub> = 191.3 Hz, <sup>2</sup>*J*<sub>C2-F3</sub> = 16.9 Hz, 1C, C2), 83.65 (dd, <sup>1</sup>*J*<sub>C3-F3</sub> = 196.9 Hz, <sup>2</sup>*J*<sub>C3-F2</sub> = 15.9 Hz, 1C, C3), 68.96 (d, <sup>3</sup>*J*<sub>C5-F3</sub> = 4.0 Hz, 1C, C5), 64.60 (d, <sup>4</sup>*J*<sub>C6-F3</sub> = 4.0 Hz, C6), 44.72 (d, <sup>2</sup>*J*<sub>C4-F3</sub> = 18.6 Hz, 1C, C4), 20.89 (1C, COCH<sub>3</sub>), 20.86 (1C, COCH<sub>3</sub>) ppm; <sup>19</sup>F NMR (470 MHz, CDCl<sub>3</sub>)  $\delta$  -192.80 (dddt, <sup>2</sup>*J*<sub>F3-H3</sub> = 44.1 Hz, <sup>3</sup>*J*<sub>F3-F2</sub> = 16.0 Hz, <sup>3</sup>*J*<sub>F3-H4</sub> = 3.6 Hz, <sup>3</sup>*J*<sub>F3-H1</sub> = <sup>4</sup>*J*<sub>F3-H1</sub> = 2.2 Hz, 1F, F3), -201.62 (dddd, *J* = <sup>2</sup>*J*<sub>F2-H2</sub> = 49.3 Hz, <sup>3</sup>*J*<sub>F2-H3</sub> = 25.0 Hz, <sup>3</sup>*J*<sub>F2-F3</sub> = 15.9 Hz, <sup>3</sup>*J*<sub>F2-H1</sub> = 8.4 Hz, 1F, F2) ppm; HRMS calcd for C<sub>10</sub>H<sub>17</sub>BrF<sub>2</sub>NO<sub>5</sub><sup>+</sup> [M + NH<sub>4</sub>]<sup>+</sup> 348.0253 found 348.0256.

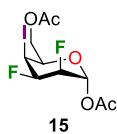

**1,6-Di-O-acetyl-2,3,4-trideoxy-2,3-difluoro-4-iodo- $\alpha$ -D-talopyranose (15).** In a manner similar to Denavit et al. [1], to a stirred solution of 1,6-anhydro-2,3-dideoxy-2,3-difluoro- $\beta$ -D-mannopyranose **5** (44.3 mg, 0.2667 mmol) in CH<sub>2</sub>Cl<sub>2</sub> (1.3 mL, 0.2 M) at 0 °C, were added pyridine (64.8  $\mu$ L, 0.8000 mmol, 3 equiv) and Tf<sub>2</sub>O (67.3  $\mu$ L, 0.4000 mmol, 1.5 equiv). The mixture was stirred at room temperature for 30 min and then quenched with water (3 mL). The mixture was extracted with CH<sub>2</sub>Cl<sub>2</sub> (3  $\times$  5 mL), and the combined organic phases were successively washed with an aqueous 1 M HCl solution (5 mL) and brine (5 mL). The organic solution was dried over MgSO<sub>4</sub>, filtered, and concentrated under reduced pressure. The crude triflate **7** was used for the next step without further purification. To a stirred solution of the crude triflate **7** in anhydrous acetonitrile (2.7 mL, 0.1 M) was added tetrabutylammonium iodide (295.5 mg, 0.8000 mmol, 3 equiv). The mixture was stirred at 65 °C for 11 days. The volatiles were removed under reduced pressure and the crude was dissolved in CH<sub>2</sub>Cl<sub>2</sub> (2.7 mL, 0.1 M). The mixture cooled to 0 °C and Ac<sub>2</sub>O (0.76 mL, 8.000 mmol, 30 equiv) and H<sub>2</sub>SO<sub>4</sub> (0.14 mL, 2.667 mmol, 10 equiv) were added. The mixture was stirred at room temperature for 17 h, then cooled to 0 °C. Sodium acetate (437 mg, 5.334 mmol, 20 equiv) was added and the mixture was stirred for an additional 20 min. Water (3 mL) was added and the mixture was extracted with CH<sub>2</sub>Cl<sub>2</sub> (3  $\times$  5 mL). The combined organic phases were successively washed with a saturated aqueous NaHCO<sub>3</sub> solution (5 mL) and brine (5 mL). The organic solution was dried over MgSO<sub>4</sub>, filtered, and concentrated under reduced pressure. The crude residue was purified by flash column chromatography (silica gel, EtOAc/Hexanes, 3:7  $\rightarrow$  1:1) to give **15** ( $\alpha/\beta$ , >20:1) as a white solid (49.5 mg, 0.1309 mmol, 49% over 3 steps). The resulting product was recrystallized from acetone/heptane to give colorless crystals.  $R_f$  = 0.40 (silica, EtOAc/hexanes 1:1); m.p. = 159.0 – 168.5 °C;  $[\alpha]_D^{25}$  = 87.6 (c 0.5, CHCl<sub>3</sub>); IR (ATR, diamond crystal)  $\nu$  2993, 2922, 1761, 1722, 1244, 1018, 970 cm<sup>-1</sup>; <sup>1</sup>H NMR (500 MHz, CDCl<sub>3</sub>)  $\delta$  6.36 (ddd, <sup>3</sup> $J_{H1-F2}$  = 8.0 Hz, <sup>3</sup> $J_{H1-H2}$  = 5.0 Hz, <sup>4</sup> $J_{H1-F3}$  = 2.2 Hz, 1H, 1H), 4.78 (ddt, <sup>2</sup> $J_{H2-F2}$  = 48.5 Hz, <sup>3</sup> $J_{H2-H1}$  = 5.7 Hz, <sup>3</sup> $J_{H2-H3}$  = <sup>3</sup> $J_{H2-F3}$  = 2.7 Hz, 1H, H2), 4.67 (dddd, <sup>2</sup> $J_{H3-F3}$  = 44.4 Hz, <sup>3</sup> $J_{H3-F2}$  = 24.9 Hz, <sup>3</sup> $J_{H3-H4}$  = 3.9 Hz, <sup>3</sup> $J_{H3-H2}$  = 2.9 Hz, 1H, H3), 4.47 (dt, <sup>3</sup> $J_{H4-F3}$  = 4.0 Hz, <sup>3</sup> $J_{H4-H3}$  = <sup>3</sup> $J_{H4-H5}$  = 4.0 Hz, 1H, H5), 4.38 (dd, <sup>2</sup> $J_{H6a-H6b}$  = 11.8 Hz, <sup>3</sup> $J_{H6a-H5}$  = 7.0 Hz, 1H, H6a), 4.24 (dd, <sup>3</sup> $J_{H6b-H6a}$  = 11.7 Hz, <sup>3</sup> $J_{H6b-H5}$  = 5.1 Hz, 1H, H6b), 3.65 (dd, <sup>3</sup> $J_{H5-H6a}$  = 6.3 Hz, <sup>3</sup> $J_{H5-H6b}$  = 5.3 Hz, 1H, H5), 2.15 (s, 3H, COCH<sub>3</sub>), 2.10 (s, 3H, COCH<sub>3</sub>) ppm; <sup>13</sup>C {<sup>1</sup>H} NMR (126 MHz, CDCl<sub>3</sub>)  $\delta$  170.65 (1C, COCH<sub>3</sub>), 167.84 (1C, COCH<sub>3</sub>), 91.04 (dd, <sup>2</sup> $J_{C1-F2}$  = 32.2 Hz, <sup>3</sup> $J_{C1-F3}$  = 6.4 Hz, 1C, C1), 84.17 (dd, <sup>1</sup> $J_{C3-F3}$  = 191.3 Hz, <sup>2</sup> $J_{C3-F2}$  = 16.8 Hz, 1C, C3), 83.83 (dd, <sup>1</sup> $J_{C2-F2}$  = 196.0 Hz, <sup>2</sup> $J_{C2-F3}$  = 16.3 Hz, 1C, C2), 68.95 (d, <sup>3</sup> $J_{C5-F3}$  = 4.4 Hz, 1C, C5), 67.46 (d, <sup>4</sup> $J_{C6-F3}$  = 3.7 Hz, 1C, C6), 21.36 (d, <sup>2</sup> $J_{C4-F3}$  = 19.0 Hz, 1C, C4), 20.91 (1C, COCH<sub>3</sub>), 20.87 (1C, COCH<sub>3</sub>) ppm; <sup>19</sup>F NMR (470 MHz, CDCl<sub>3</sub>)  $\delta$  -184.56 (dddd, <sup>2</sup> $J_{F3-H3}$  = 44.4 Hz, <sup>3</sup> $J_{F3-F2}$  = 17.7 Hz, <sup>3</sup> $J_{F3-H4}$  = 4.2 Hz, <sup>3</sup> $J_{F3-H2}$  = 2.7 Hz, <sup>4</sup> $J_{F3-H1}$  = 2.2 Hz, 1F, F3), -200.55 (dddd, <sup>2</sup> $J_{F2-H2}$  = 48.6 Hz, <sup>3</sup> $J_{F2-H3}$  = 24.9 Hz, <sup>3</sup> $J_{F2-F3}$  = 17.7 Hz, <sup>3</sup> $J_{F2-H1}$  = 8.0 Hz, 1F, F2) ppm; HRMS calcd for C<sub>10</sub>H<sub>17</sub>F<sub>2</sub>INO<sub>5</sub><sup>+</sup> [M + NH<sub>4</sub>]<sup>+</sup> 396.0114 found 396.0106.

## II. COMPARISON OF $^{19}\text{F}$ RESONANCES OF HALOGENATED TALOSE AND ALLOSE ANALOGUES

Talopyranose analogues **12–15** incorporate a 2,3-*cis*, 3,4-*cis* relationship for the halogens. We previously prepared a small set of trihalogenated allopyranose analogues that also included the 2,3-*cis*, 3,4-*cis* relationship for the halogens (**Figure 1a**) [2]. In order to compare the signals we performed  $^{19}\text{F}$  NMR analysis of halogenated allopyranose analogues **4a–d** (**Figure 2**). Unlike analogues **12–15**, compounds **4a–d** adopted a  $\beta$  configuration as the major anomer in acetone- $d_6$ . Moreover, both F2 and F4 are vicinal to the halogen at C3 and undergo an increase in chemical shift depending on the C3 halogen. In all cases, the  $^{19}\text{F}$  resonance of F2 occurs at lower field than F4, except for analogue **4d**, whereas the chemical shift is similar. Finally, the chemical shifts of the fluorine atoms next to the chlorine, bromine or iodine atoms appear systematically at lower field for the allose analogues than the talose analogues.

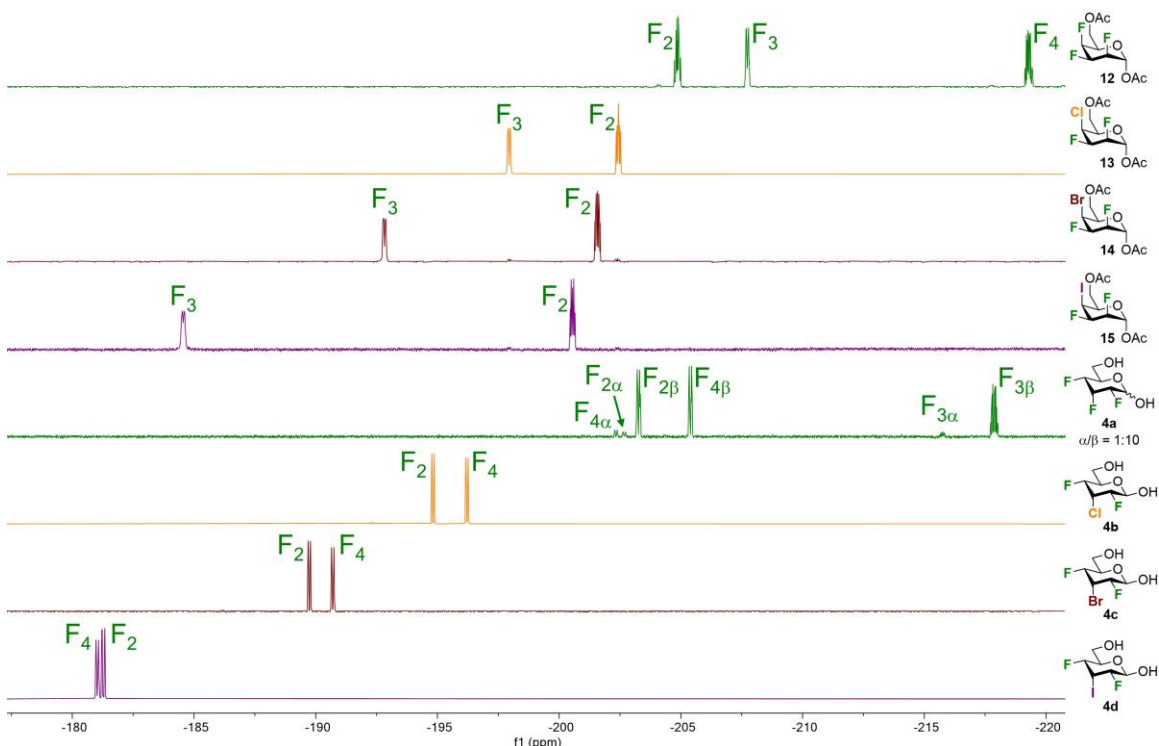

**Figure S1.** Direct comparison of  $^{19}\text{F}$  resonances of halogenated talose analogues **12–15** ( $^{19}\text{F}$  NMR; 470 MHz,  $\text{CDCl}_3$ ) and halogenated allose analogues **4a–d** ( $^{19}\text{F}$  NMR; 470 MHz, acetone- $d_6$ ).

### III. Crystal structure determination

**Table S1.** Crystal data and structure refinement for compound **13**

|                                                                 |                                                                                |
|-----------------------------------------------------------------|--------------------------------------------------------------------------------|
| Empirical formula                                               | C <sub>10</sub> H <sub>13</sub> ClF <sub>2</sub> O <sub>5</sub>                |
| Formula weight                                                  | 286.65                                                                         |
| Temperature [K]                                                 | 150                                                                            |
| Crystal system                                                  | orthorhombic                                                                   |
| Space group (number)                                            | <i>P</i> 2 <sub>1</sub> 2 <sub>1</sub> 2 <sub>1</sub> (19)                     |
| <i>a</i> [Å]                                                    | 8.7542(4)                                                                      |
| <i>b</i> [Å]                                                    | 9.4335(4)                                                                      |
| <i>c</i> [Å]                                                    | 14.7462(6)                                                                     |
| $\alpha$ [°]                                                    | 90                                                                             |
| $\beta$ [°]                                                     | 90                                                                             |
| $\gamma$ [°]                                                    | 90                                                                             |
| Volume [Å <sup>3</sup> ]                                        | 1217.78(9)                                                                     |
| <i>Z</i>                                                        | 4                                                                              |
| $\rho_{\text{calc}}$ [gcm <sup>-3</sup> ]                       | 1.563                                                                          |
| $\mu$ [mm <sup>-1</sup> ]                                       | 2.084                                                                          |
| <i>F</i> (000)                                                  | 592                                                                            |
| Crystal size [mm <sup>3</sup> ]                                 | 0.1×0.13×0.25                                                                  |
| Crystal colour                                                  | clear light colourless                                                         |
| Crystal shape                                                   | block                                                                          |
| Radiation                                                       | Ga <i>K</i> <sub><math>\alpha</math></sub> ( $\lambda$ =1.34139 Å)             |
| 2 $\theta$ range [°]                                            | 9.68 to 137.32 (0.72 Å)                                                        |
| Index ranges                                                    | -12 ≤ <i>h</i> ≤ 10<br>-13 ≤ <i>k</i> ≤ 12<br>-20 ≤ <i>l</i> ≤ 20              |
| Reflections collected                                           | 48497                                                                          |
| Independent reflections                                         | 3400<br><i>R</i> <sub>int</sub> = 0.0445<br><i>R</i> <sub>sigma</sub> = 0.0209 |
| Completeness to<br>$\theta = 53.594^\circ$                      | 99.9 %                                                                         |
| Data / Restraints / Parameters                                  | 3400 / 0 / 167                                                                 |
| Goodness-of-fit on <i>F</i> <sup>2</sup>                        | 1.067                                                                          |
| Final <i>R</i> indexes<br>[ <i>I</i> ≥ 2 $\sigma$ ( <i>I</i> )] | <i>R</i> <sub>1</sub> = 0.0259<br><i>wR</i> <sub>2</sub> = 0.0743              |
| Final <i>R</i> indexes<br>[all data]                            | <i>R</i> <sub>1</sub> = 0.0261<br><i>wR</i> <sub>2</sub> = 0.0745              |
| Largest peak/hole [eÅ <sup>-3</sup> ]                           | 0.26/-0.21                                                                     |
| Extinction coefficient                                          | 0.0042(10)                                                                     |
| Flack X parameter                                               | 0.170(17)                                                                      |



**Table S2.** Crystal data and structure refinement for compound **14**

|                                                                 |                                                                                |
|-----------------------------------------------------------------|--------------------------------------------------------------------------------|
| Empirical formula                                               | C <sub>10</sub> H <sub>13</sub> BrF <sub>2</sub> O <sub>5</sub>                |
| Formula weight                                                  | 331.11                                                                         |
| Temperature [K]                                                 | 150                                                                            |
| Crystal system                                                  | orthorhombic                                                                   |
| Space group (number)                                            | <i>P</i> 2 <sub>1</sub> 2 <sub>1</sub> 2 <sub>1</sub> (19)                     |
| <i>a</i> [Å]                                                    | 8.8122(3)                                                                      |
| <i>b</i> [Å]                                                    | 9.4110(4)                                                                      |
| <i>c</i> [Å]                                                    | 14.8090(6)                                                                     |
| $\alpha$ [°]                                                    | 90                                                                             |
| $\beta$ [°]                                                     | 90                                                                             |
| $\gamma$ [°]                                                    | 90                                                                             |
| Volume [Å <sup>3</sup> ]                                        | 1228.13(8)                                                                     |
| <i>Z</i>                                                        | 4                                                                              |
| $\rho_{\text{calc}}$ [gcm <sup>-3</sup> ]                       | 1.791                                                                          |
| $\mu$ [mm <sup>-1</sup> ]                                       | 3.264                                                                          |
| <i>F</i> (000)                                                  | 664                                                                            |
| Crystal size [mm <sup>3</sup> ]                                 | 0.16×0.21×0.24                                                                 |
| Crystal colour                                                  | clear light colourless                                                         |
| Crystal shape                                                   | block                                                                          |
| Radiation                                                       | Ga <i>K</i> <sub><math>\alpha</math></sub> ( $\lambda$ =1.34139 Å)             |
| 2 $\theta$ range [°]                                            | 9.69 to 137.36 (0.72 Å)                                                        |
| Index ranges                                                    | -12 ≤ <i>h</i> ≤ 12<br>-13 ≤ <i>k</i> ≤ 13<br>-20 ≤ <i>l</i> ≤ 20              |
| Reflections collected                                           | 33417                                                                          |
| Independent reflections                                         | 3423<br><i>R</i> <sub>int</sub> = 0.0375<br><i>R</i> <sub>sigma</sub> = 0.0216 |
| Completeness to<br>$\theta = 53.594^\circ$                      | 99.8 %                                                                         |
| Data / Restraints / Parameters                                  | 3423 / 0 / 166                                                                 |
| Goodness-of-fit on <i>F</i> <sup>2</sup>                        | 1.130                                                                          |
| Final <i>R</i> indexes<br>[ <i>I</i> ≥ 2 $\sigma$ ( <i>I</i> )] | <i>R</i> <sub>1</sub> = 0.0229<br><i>wR</i> <sub>2</sub> = 0.0621              |
| Final <i>R</i> indexes<br>[all data]                            | <i>R</i> <sub>1</sub> = 0.0229<br><i>wR</i> <sub>2</sub> = 0.0622              |
| Largest peak/hole [eÅ <sup>-3</sup> ]                           | 0.38/-0.94                                                                     |
| Flack <i>X</i> parameter                                        | 0.10(2)                                                                        |

**Table S3.** Crystal data and structure refinement for compound **15**

|                                                                 |                                                                                |
|-----------------------------------------------------------------|--------------------------------------------------------------------------------|
| Empirical formula                                               | C <sub>10</sub> H <sub>13</sub> F <sub>2</sub> IO <sub>5</sub>                 |
| Formula weight                                                  | 378.10                                                                         |
| Temperature [K]                                                 | 150                                                                            |
| Crystal system                                                  | orthorhombic                                                                   |
| Space group (number)                                            | <i>P</i> 2 <sub>1</sub> 2 <sub>1</sub> 2 <sub>1</sub> (19)                     |
| <i>a</i> [Å]                                                    | 8.8808(15)                                                                     |
| <i>b</i> [Å]                                                    | 9.4551(16)                                                                     |
| <i>c</i> [Å]                                                    | 14.927(2)                                                                      |
| $\alpha$ [°]                                                    | 90                                                                             |
| $\beta$ [°]                                                     | 90                                                                             |
| $\gamma$ [°]                                                    | 90                                                                             |
| Volume [Å <sup>3</sup> ]                                        | 1253.4(4)                                                                      |
| <i>Z</i>                                                        | 4                                                                              |
| $\rho_{\text{calc}}$ [gcm <sup>-3</sup> ]                       | 2.004                                                                          |
| $\mu$ [mm <sup>-1</sup> ]                                       | 14.021                                                                         |
| <i>F</i> (000)                                                  | 736                                                                            |
| Crystal size [mm <sup>3</sup> ]                                 | 0.1×0.14×0.18                                                                  |
| Crystal color                                                   | clear light colorless                                                          |
| Crystal shape                                                   | block                                                                          |
| Radiation                                                       | Ga <i>K</i> <sub><math>\alpha</math></sub> ( $\lambda$ =1.34139 Å)             |
| 2 $\theta$ range [°]                                            | 9.63 to 121.06 (0.77 Å)                                                        |
| Index ranges                                                    | -11 ≤ <i>h</i> ≤ 11<br>-12 ≤ <i>k</i> ≤ 12<br>-19 ≤ <i>l</i> ≤ 18              |
| Reflections collected                                           | 22909                                                                          |
| Independent reflections                                         | 2858<br><i>R</i> <sub>int</sub> = 0.0471<br><i>R</i> <sub>sigma</sub> = 0.0263 |
| Completeness to<br>$\theta = 53.594^\circ$                      | 99.9 %                                                                         |
| Data / Restraints / Parameters                                  | 2858 / 0 / 166                                                                 |
| Goodness-of-fit on <i>F</i> <sup>2</sup>                        | 1.108                                                                          |
| Final <i>R</i> indexes<br>[ <i>I</i> ≥ 2 $\sigma$ ( <i>I</i> )] | <i>R</i> <sub>1</sub> = 0.0651<br><i>wR</i> <sub>2</sub> = 0.1998              |
| Final <i>R</i> indexes<br>[all data]                            | <i>R</i> <sub>1</sub> = 0.0660<br><i>wR</i> <sub>2</sub> = 0.2007              |
| Largest peak/hole [eÅ <sup>-3</sup> ]                           | 1.44/-1.37                                                                     |
| Flack X parameter                                               | 0.30(3)                                                                        |

**Table S4.** Crystal data and structure refinement for compound **17**

|                                           |                                                                               |
|-------------------------------------------|-------------------------------------------------------------------------------|
| Empirical formula                         | C <sub>20</sub> H <sub>15</sub> Br <sub>2</sub> F <sub>3</sub> O <sub>5</sub> |
| Formula weight                            | 552.14                                                                        |
| Temperature [K]                           | 150                                                                           |
| Crystal system                            | orthorhombic                                                                  |
| Space group (number)                      | <i>P</i> 2 <sub>1</sub> 2 <sub>1</sub> 2 <sub>1</sub>                         |
| <i>a</i> [Å]                              | 5.95820(10)                                                                   |
| <i>b</i> [Å]                              | 11.7697(3)                                                                    |
| <i>c</i> [Å]                              | 28.7068(7)                                                                    |
| $\alpha$ [°]                              | 90                                                                            |
| $\beta$ [°]                               | 90                                                                            |
| $\gamma$ [°]                              | 90                                                                            |
| Volume [Å <sup>3</sup> ]                  | 2013.10(8)                                                                    |
| <i>Z</i>                                  | 4                                                                             |
| $\rho_{\text{calc}}$ [gcm <sup>-3</sup> ] | 1.822                                                                         |
| $\mu$ [mm <sup>-1</sup> ]                 | 3.726                                                                         |
| <i>F</i> (000)                            | 1088.0                                                                        |
| Crystal size [mm <sup>3</sup> ]           | 0.25×0.16×0.09                                                                |
| Radiation                                 | Ga <i>K</i> <sub><math>\alpha</math></sub> ( $\lambda$ =1.34139 Å)            |
| 2 $\theta$ range [°]                      | 5.356 to 121.326                                                              |
| Index ranges                              | $-7 \leq h \leq 7$<br>$-15 \leq k \leq 15$<br>$-37 \leq l \leq 37$            |
| Reflections collected                     | 29233                                                                         |
| Independent reflections                   | 4629<br>$R_{\text{int}} = 0.0320$<br>$R_{\text{sigma}} = 0.0182$              |
| Data / Restraints / Parameters            | 4629 / 0 / 272                                                                |
| Goodness-of-fit on <i>F</i> <sup>2</sup>  | 1.180                                                                         |
| Final <i>R</i> indexes                    | $R_1 = 0.0272$                                                                |
| [ $I \geq 2\sigma(I)$ ]                   | $wR_2 = 0.0630$                                                               |
| Final <i>R</i> indexes                    | $R_1 = 0.0273$                                                                |
| [all data]                                | $wR_2 = 0.0632$                                                               |
| Largest peak/hole [eÅ <sup>-3</sup> ]     | 0.47/−0.67                                                                    |
| Flack X parameter                         | −0.032(5)                                                                     |

## IV. Crystal packing

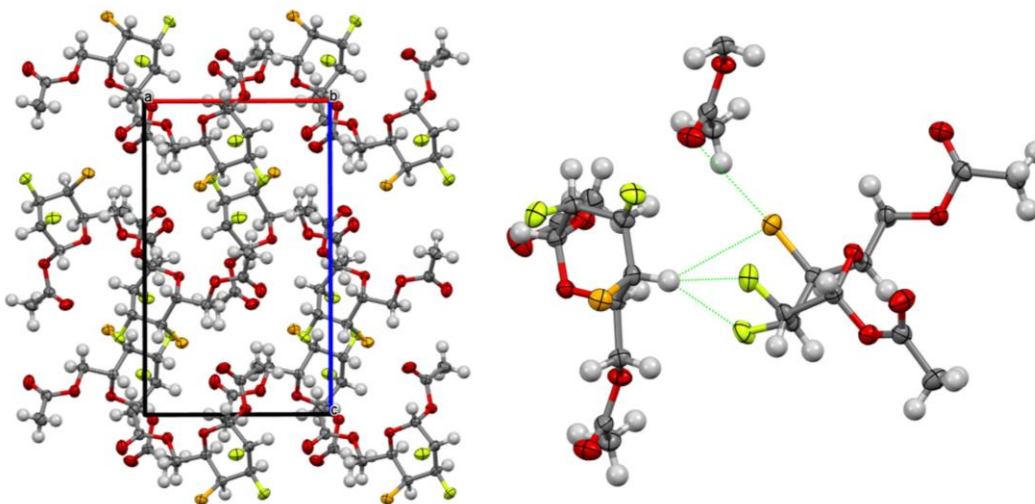

**Figure S2.** Packing arrangement of compound compound **13**. ORTEP diagram showing 50% thermal ellipsoid probability: carbon (gray), oxygen (red), fluorine (green), chlorine (orange), and hydrogen (white).

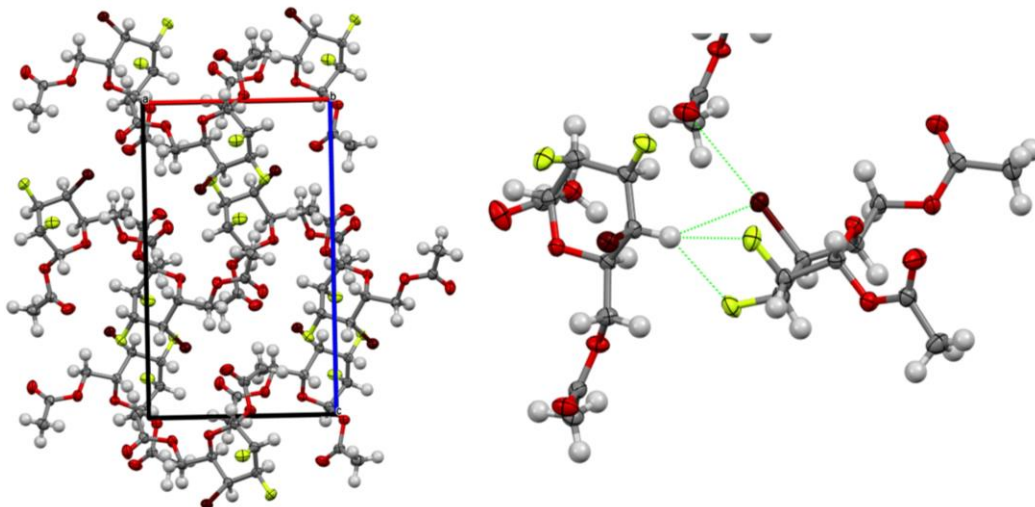

**Figure S3.** Packing arrangement of compound compound **14**. ORTEP diagram showing 50% thermal ellipsoid probability: carbon (gray), oxygen (red), fluorine (green), bromine (dark red) and hydrogen (white).

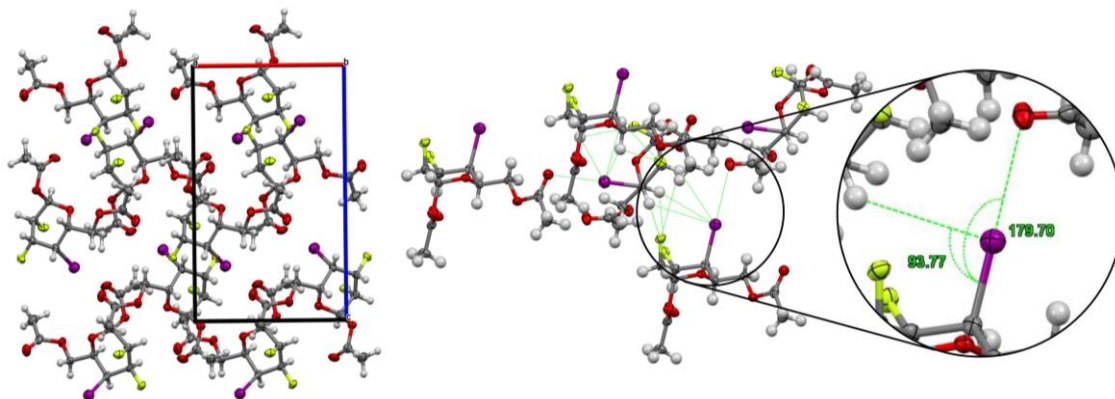

**Figure S4.** Packing arrangement of compound compound **15**. ORTEP diagram showing 50% thermal ellipsoid probability: carbon (gray), oxygen (red), fluorine (green), iodine (purple), and hydrogen (white).

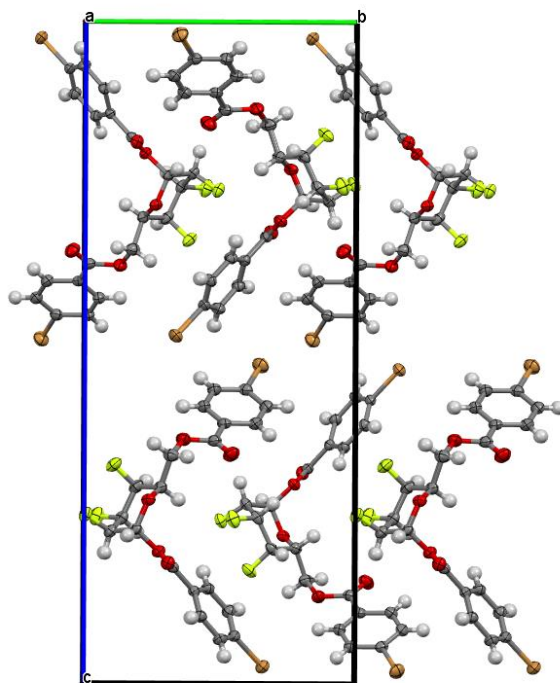

**Figure S5.** Packing arrangement of compound compound **17**. ORTEP diagram showing 50% thermal ellipsoid probability: carbon (gray), oxygen (red), fluorine (green), and hydrogen (white).

## V. Density functional theory calculations

DFT computations were performed using Gaussian 16 revision B.01 [3] with the CAM-B3LYP [4,5,6] functional and the Def2TZVP basis set [7], which includes effective core potentials for iodine. Empirical dispersion was accounted with Grimme's D3 [8,9] correction including Becke-Johnson damping [10]. Computations were performed both in the gas phase (i.e. individual molecules with thermal corrections based on ideal gas assumptions) and in a chloroform solution, using the polarizable continuum model (PCM) [11].

**Table S5.** Dipoles (Debye) of  ${}^4C_1$  and  ${}^1C_4$  structures in gas phase and chloroform (PCM) computed from CAM-B3LYP-D3BJ/Def2TZVP.

| Entry | X  | Gas phase ${}^1C_4$ | $CHCl_3$ (PCM) ${}^1C_4$ | Gas phase ${}^4C_1$ | $CHCl_3$ (PCM) ${}^4C_1$ |
|-------|----|---------------------|--------------------------|---------------------|--------------------------|
| 1     | F  | 4.55                | 5.95                     | 6.48                | 8.09                     |
| 2     | Cl | 4.45                | 5.93                     | 6.34                | 7.93                     |
| 3     | Br | 4.40                | 5.89                     | 6.30                | 7.94                     |
| 4     | I  | 4.32                | 5.78                     | 6.07                | 7.64                     |

**Table S6.** Optimized structure of  ${}^4C_1$  X=F CAM-B3LYP-D3BJ/Def2TZVP

|   |              |              |              |
|---|--------------|--------------|--------------|
| 6 | -0.444987000 | -0.161669000 | -0.013556000 |
| 6 | -0.509661000 | 1.288132000  | 0.444886000  |
| 6 | 0.867504000  | 1.725589000  | 0.888767000  |
| 6 | 1.922046000  | 1.470049000  | -0.164654000 |
| 6 | 1.843272000  | 0.022986000  | -0.636910000 |
| 8 | 0.560729000  | -0.354555000 | -0.995416000 |
| 6 | -1.729482000 | -0.628822000 | -0.656171000 |
| 8 | -2.738200000 | -0.544998000 | 0.349494000  |
| 9 | -0.959716000 | 2.088614000  | -0.583789000 |
| 9 | 0.864265000  | 3.053149000  | 1.249848000  |
| 9 | 1.726125000  | 2.280931000  | -1.257485000 |
| 8 | 2.325040000  | -0.771166000 | 0.445236000  |
| 6 | -3.973093000 | -0.934978000 | -0.021457000 |
| 6 | -4.955102000 | -0.756809000 | 1.094162000  |
| 8 | -4.218457000 | -1.359796000 | -1.113217000 |
| 6 | 2.979104000  | -1.923314000 | 0.126846000  |
| 6 | 3.331586000  | -2.686712000 | 1.362995000  |
| 8 | 3.224923000  | -2.245225000 | -0.994852000 |
| 1 | -0.236559000 | -0.781461000 | 0.865138000  |
| 1 | -1.219060000 | 1.383864000  | 1.268156000  |
| 1 | 1.134582000  | 1.136369000  | 1.770817000  |
| 1 | 2.915882000  | 1.677687000  | 0.234138000  |
| 1 | 2.463932000  | -0.129114000 | -1.515196000 |
| 1 | -1.988144000 | 0.001188000  | -1.504535000 |
| 1 | -1.622993000 | -1.654947000 | -1.003070000 |
| 1 | -4.596787000 | -1.254630000 | 1.994048000  |
| 1 | -5.056818000 | 0.304184000  | 1.322148000  |
| 1 | -5.916899000 | -1.161929000 | 0.796822000  |
| 1 | 3.894067000  | -2.051946000 | 2.046341000  |
| 1 | 2.418853000  | -2.992633000 | 1.874219000  |
| 1 | 3.914471000  | -3.561664000 | 1.094403000  |

**Table S7.** Optimized structure of  ${}^4C_1$  X=Cl CAM-B3LYP-D3BJ/Def2TZVP

|    |              |              |              |
|----|--------------|--------------|--------------|
| 6  | -0.345676000 | -0.309832000 | 0.014589000  |
| 6  | -0.518093000 | 1.111206000  | 0.546635000  |
| 6  | 0.839756000  | 1.589091000  | 1.025133000  |
| 6  | 1.935485000  | 1.436200000  | -0.008319000 |
| 6  | 1.922198000  | 0.026687000  | -0.588515000 |
| 8  | 0.657978000  | -0.381150000 | -0.981842000 |
| 6  | -1.585546000 | -0.901726000 | -0.609339000 |
| 8  | -2.598158000 | -0.863953000 | 0.393984000  |
| 17 | -1.249434000 | 2.211093000  | -0.650356000 |
| 9  | 0.788138000  | 2.886504000  | 1.474338000  |
| 9  | 1.765110000  | 2.321051000  | -1.046732000 |
| 8  | 2.436810000  | -0.825450000 | 0.431801000  |
| 6  | -3.815868000 | -1.300636000 | 0.018039000  |
| 6  | -4.810648000 | -1.148706000 | 1.125903000  |
| 8  | -4.038512000 | -1.740518000 | -1.072562000 |
| 6  | 3.139299000  | -1.921412000 | 0.028569000  |
| 6  | 3.524987000  | -2.760435000 | 1.204206000  |
| 8  | 3.397224000  | -2.146423000 | -1.113771000 |
| 1  | -0.057919000 | -0.929310000 | 0.871838000  |
| 1  | -1.207160000 | 1.089348000  | 1.386534000  |
| 1  | 1.116158000  | 0.956826000  | 1.875065000  |
| 1  | 2.906055000  | 1.638896000  | 0.446259000  |
| 1  | 2.551112000  | -0.028383000 | -1.472322000 |
| 1  | -1.894303000 | -0.329276000 | -1.480733000 |
| 1  | -1.393644000 | -1.928238000 | -0.917269000 |
| 1  | -4.434852000 | -1.611953000 | 2.036950000  |
| 1  | -4.961591000 | -0.089012000 | 1.332147000  |
| 1  | -5.751551000 | -1.602267000 | 0.831722000  |
| 1  | 4.057483000  | -2.155274000 | 1.936635000  |
| 1  | 2.626449000  | -3.145313000 | 1.686483000  |
| 1  | 4.146808000  | -3.585297000 | 0.872008000  |



**Table S8.** Optimized structure of  ${}^4C_1$  X=Br CAM-B3LYP-D3BJ/Def2TZVP

|    |              |              |              |
|----|--------------|--------------|--------------|
| 6  | 0.111587000  | 0.597503000  | 0.064537000  |
| 6  | 0.451899000  | -0.746764000 | 0.700769000  |
| 6  | -0.844006000 | -1.364204000 | 1.188186000  |
| 6  | -1.928755000 | -1.421448000 | 0.133055000  |
| 6  | -2.078636000 | -0.066425000 | -0.548768000 |
| 8  | -0.866198000 | 0.469988000  | -0.951438000 |
| 6  | 1.274273000  | 1.318394000  | -0.572250000 |
| 8  | 2.263727000  | 1.462501000  | 0.443777000  |
| 35 | 1.459045000  | -1.924139000 | -0.479034000 |
| 9  | -0.643513000 | -2.610445000 | 1.730608000  |
| 9  | -1.629215000 | -2.349382000 | -0.836398000 |
| 8  | -2.721337000 | 0.783653000  | 0.397530000  |
| 6  | 3.430200000  | 2.013608000  | 0.055219000  |
| 6  | 4.416614000  | 2.040548000  | 1.180324000  |
| 8  | 3.619773000  | 2.412037000  | -1.057276000 |
| 6  | -3.546381000 | 1.749435000  | -0.096693000 |
| 6  | -4.063429000 | 2.614639000  | 1.007275000  |
| 8  | -3.802348000 | 1.856971000  | -1.256401000 |
| 1  | -0.281349000 | 1.225804000  | 0.872965000  |
| 1  | 1.113524000  | -0.580519000 | 1.544940000  |
| 1  | -1.218600000 | -0.716235000 | 1.987888000  |
| 1  | -2.875660000 | -1.711452000 | 0.590060000  |
| 1  | -2.687317000 | -0.155223000 | -1.443928000 |
| 1  | 1.672191000  | 0.752198000  | -1.410953000 |
| 1  | 0.953942000  | 2.294718000  | -0.932545000 |
| 1  | 3.972860000  | 2.502102000  | 2.061119000  |
| 1  | 4.689181000  | 1.018595000  | 1.444223000  |
| 1  | 5.301777000  | 2.587509000  | 0.872232000  |
| 1  | -4.533122000 | 2.000751000  | 1.774562000  |
| 1  | -3.232648000 | 3.144685000  | 1.473068000  |
| 1  | -4.775941000 | 3.327443000  | 0.605202000  |

**Table S9.** Optimized structure of  ${}^4C_1$  X=I CAM-B3LYP-D3BJ/Def2TZVP

|    |              |              |              |
|----|--------------|--------------|--------------|
| 6  | -0.211679000 | 0.807140000  | 0.097086000  |
| 6  | 0.327557000  | -0.434644000 | 0.800600000  |
| 6  | -0.865638000 | -1.228402000 | 1.295099000  |
| 6  | -1.902147000 | -1.505408000 | 0.226333000  |
| 6  | -2.249127000 | -0.226374000 | -0.526085000 |
| 8  | -1.127519000 | 0.478715000  | -0.932161000 |
| 6  | 0.824758000  | 1.696539000  | -0.544648000 |
| 8  | 1.765060000  | 2.021254000  | 0.475741000  |
| 53 | 1.708491000  | -1.591402000 | -0.376547000 |
| 9  | -0.487116000 | -2.403823000 | 1.900185000  |
| 9  | -1.432029000 | -2.416227000 | -0.691761000 |
| 8  | -3.045540000 | 0.552222000  | 0.362846000  |
| 6  | 2.848396000  | 2.717215000  | 0.078586000  |
| 6  | 3.805766000  | 2.918242000  | 1.210906000  |
| 8  | 2.996061000  | 3.100271000  | -1.045554000 |
| 6  | -3.999395000 | 1.349099000  | -0.196240000 |
| 6  | -4.678685000 | 2.170405000  | 0.851932000  |
| 8  | -4.236261000 | 1.360296000  | -1.364937000 |
| 1  | -0.729300000 | 1.391026000  | 0.868406000  |
| 1  | 0.926950000  | -0.122482000 | 1.649583000  |
| 1  | -1.359394000 | -0.616888000 | 2.058396000  |
| 1  | -2.801347000 | -1.924207000 | 0.679414000  |
| 1  | -2.811152000 | -0.454617000 | -1.427075000 |
| 1  | 1.320564000  | 1.187859000  | -1.368316000 |
| 1  | 0.353596000  | 2.599788000  | -0.929477000 |
| 1  | 3.288059000  | 3.328899000  | 2.076323000  |
| 1  | 4.223575000  | 1.954216000  | 1.501761000  |
| 1  | 4.603959000  | 3.582813000  | 0.896508000  |
| 1  | -5.065646000 | 1.525368000  | 1.639585000  |
| 1  | -3.956499000 | 2.848193000  | 1.307062000  |
| 1  | -5.484317000 | 2.739828000  | 0.400113000  |

**Table S10.** Optimized structure of  $^1\text{C}_4$  X=F CAM-B3LYP-D3BJ/Def2TZVP

|   |              |              |              |
|---|--------------|--------------|--------------|
| 6 | 2.422267000  | -0.157048000 | -0.920780000 |
| 6 | 2.450880000  | 0.768016000  | 0.279919000  |
| 6 | 1.305681000  | 1.757062000  | 0.192478000  |
| 6 | -0.012012000 | 1.034718000  | -0.022146000 |
| 8 | 0.097751000  | 0.237032000  | -1.172471000 |
| 6 | 1.054458000  | -0.808834000 | -1.119909000 |
| 6 | 0.729335000  | -1.893925000 | -0.106785000 |
| 9 | 3.406910000  | -1.115207000 | -0.788096000 |
| 9 | 2.318628000  | 0.030789000  | 1.442176000  |
| 9 | 1.263738000  | 2.507410000  | 1.343164000  |
| 8 | -0.557258000 | -2.413985000 | -0.419470000 |
| 8 | -1.280724000 | -1.961134000 | 1.658673000  |
| 6 | -1.502656000 | -2.341898000 | 0.544760000  |
| 6 | -2.834565000 | -2.773260000 | 0.025685000  |
| 8 | -0.973333000 | 2.016033000  | -0.299924000 |
| 8 | -2.624709000 | 0.532833000  | 0.043096000  |
| 6 | -2.276204000 | 1.640422000  | -0.236167000 |
| 6 | -3.169965000 | 2.793117000  | -0.561033000 |
| 1 | 2.650477000  | 0.433419000  | -1.811319000 |
| 1 | 3.407418000  | 1.289161000  | 0.342535000  |
| 1 | 1.461634000  | 2.432072000  | -0.652498000 |
| 1 | -0.312514000 | 0.451720000  | 0.850936000  |
| 1 | 1.017908000  | -1.254084000 | -2.113572000 |
| 1 | 0.740660000  | -1.541663000 | 0.918377000  |
| 1 | 1.458571000  | -2.696642000 | -0.205474000 |
| 1 | -3.453936000 | -3.107531000 | 0.852757000  |
| 1 | -3.301301000 | -1.900443000 | -0.431582000 |
| 1 | -2.733031000 | -3.551878000 | -0.726267000 |
| 1 | -4.206319000 | 2.486526000  | -0.464101000 |
| 1 | -2.957041000 | 3.625781000  | 0.108117000  |
| 1 | -2.973127000 | 3.130179000  | -1.578459000 |

**Table S11.** Optimized structure of  $^1\text{C}_4$  X=Cl CAM-B3LYP-D3BJ/Def2TZVP

|    |              |              |              |
|----|--------------|--------------|--------------|
| 6  | -2.223159000 | -0.334945000 | -0.770739000 |
| 6  | -2.018888000 | -1.254891000 | 0.418785000  |
| 6  | -0.706794000 | -2.002095000 | 0.261331000  |
| 6  | 0.438437000  | -1.045433000 | -0.010349000 |
| 8  | 0.118016000  | -0.270863000 | -1.136604000 |
| 6  | -1.014467000 | 0.575022000  | -1.010567000 |
| 6  | -0.823862000 | 1.684670000  | 0.012089000  |
| 17 | -3.747927000 | 0.575973000  | -0.621593000 |
| 9  | -1.975667000 | -0.525880000 | 1.591404000  |
| 9  | -0.463425000 | -2.733638000 | 1.398970000  |
| 8  | 0.339633000  | 2.416987000  | -0.352337000 |
| 8  | 1.222313000  | 2.096171000  | 1.688132000  |
| 6  | 1.322745000  | 2.515794000  | 0.570499000  |
| 6  | 2.527932000  | 3.188845000  | 0.001305000  |
| 8  | 1.546899000  | -1.829443000 | -0.359563000 |
| 8  | 2.917851000  | -0.076092000 | -0.059837000 |
| 6  | 2.761399000  | -1.223915000 | -0.350266000 |
| 6  | 3.830881000  | -2.188770000 | -0.748078000 |
| 1  | -2.333378000 | -0.960587000 | -1.654347000 |
| 1  | -2.845440000 | -1.960166000 | 0.511818000  |
| 1  | -0.777300000 | -2.692768000 | -0.582356000 |
| 1  | 0.675819000  | -0.425956000 | 0.857002000  |
| 1  | -1.114431000 | 1.034714000  | -1.992872000 |
| 1  | -0.722382000 | 1.318237000  | 1.027516000  |
| 1  | -1.677109000 | 2.358525000  | -0.028740000 |
| 1  | 3.123075000  | 3.606768000  | 0.807764000  |
| 1  | 3.114779000  | 2.425798000  | -0.510280000 |
| 1  | 2.248803000  | 3.956421000  | -0.716445000 |
| 1  | 4.797987000  | -1.699487000 | -0.695854000 |
| 1  | 3.809235000  | -3.056213000 | -0.089652000 |
| 1  | 3.643885000  | -2.540926000 | -1.762230000 |

**Table S12.** Optimized structure of  ${}^1\text{C}_4 \text{X}=\text{Br}$  CAM-B3LYP-D3BJ/Def2TZVP

|    |              |              |              |
|----|--------------|--------------|--------------|
| 6  | -1.775625000 | -0.555975000 | -0.622339000 |
| 6  | -1.439875000 | -1.464699000 | 0.543586000  |
| 6  | -0.076359000 | -2.094485000 | 0.314615000  |
| 6  | 0.968208000  | -1.041278000 | -0.000406000 |
| 8  | 0.527680000  | -0.287460000 | -1.099837000 |
| 6  | -0.665270000 | 0.458801000  | -0.906780000 |
| 6  | -0.511518000 | 1.569976000  | 0.120808000  |
| 35 | -3.520214000 | 0.272402000  | -0.389454000 |
| 9  | -1.401829000 | -0.747992000 | 1.724189000  |
| 9  | 0.283751000  | -2.811032000 | 1.430464000  |
| 8  | 0.572057000  | 2.394598000  | -0.289190000 |
| 8  | 1.566163000  | 2.139896000  | 1.708729000  |
| 6  | 1.582428000  | 2.572039000  | 0.591473000  |
| 6  | 2.700289000  | 3.348268000  | -0.022783000 |
| 8  | 2.120668000  | -1.724753000 | -0.412929000 |
| 8  | 3.352219000  | 0.134693000  | -0.150636000 |
| 6  | 3.279121000  | -1.018987000 | -0.450762000 |
| 6  | 4.405793000  | -1.885500000 | -0.911888000 |
| 1  | -1.881176000 | -1.176857000 | -1.508342000 |
| 1  | -2.194072000 | -2.242532000 | 0.666130000  |
| 1  | -0.129345000 | -2.782181000 | -0.532726000 |
| 1  | 1.194898000  | -0.411363000 | 0.862250000  |
| 1  | -0.850699000 | 0.918251000  | -1.876561000 |
| 1  | -0.332427000 | 1.202279000  | 1.125091000  |
| 1  | -1.414842000 | 2.176229000  | 0.131159000  |
| 1  | 3.292116000  | 3.811120000  | 0.761284000  |
| 1  | 3.327089000  | 2.640950000  | -0.565982000 |
| 1  | 2.325958000  | 4.093176000  | -0.720805000 |
| 1  | 5.329859000  | -1.316916000 | -0.896766000 |
| 1  | 4.487925000  | -2.758999000 | -0.266365000 |
| 1  | 4.201448000  | -2.240771000 | -1.921594000 |

**Table S13.** Optimized structure of  ${}^1\text{C}_4$  X=I CAM-B3LYP-D3BJ/Def2TZVP

|    |              |              |              |
|----|--------------|--------------|--------------|
| 6  | -1.370677000 | -0.644607000 | -0.554344000 |
| 6  | -0.973356000 | -1.549255000 | 0.594868000  |
| 6  | 0.408437000  | -2.125923000 | 0.332655000  |
| 6  | 1.406268000  | -1.035379000 | -0.002885000 |
| 8  | 0.913159000  | -0.294147000 | -1.087797000 |
| 6  | -0.301808000 | 0.408072000  | -0.860507000 |
| 6  | -0.152161000 | 1.518545000  | 0.168832000  |
| 53 | -3.335280000 | 0.174233000  | -0.274247000 |
| 9  | -0.936047000 | -0.842013000 | 1.782764000  |
| 9  | 0.821236000  | -2.832438000 | 1.436920000  |
| 8  | 0.896981000  | 2.375120000  | -0.263670000 |
| 8  | 1.930182000  | 2.168638000  | 1.719743000  |
| 6  | 1.913818000  | 2.594012000  | 0.599891000  |
| 6  | 2.993184000  | 3.406115000  | -0.036492000 |
| 8  | 2.572782000  | -1.675561000 | -0.445568000 |
| 8  | 3.746050000  | 0.222179000  | -0.190849000 |
| 6  | 3.705150000  | -0.930495000 | -0.501311000 |
| 6  | 4.850268000  | -1.753347000 | -0.995903000 |
| 1  | -1.476335000 | -1.262893000 | -1.441930000 |
| 1  | -1.689847000 | -2.360001000 | 0.729145000  |
| 1  | 0.359859000  | -2.812629000 | -0.515697000 |
| 1  | 1.631394000  | -0.401379000 | 0.857182000  |
| 1  | -0.524915000 | 0.866785000  | -1.822694000 |
| 1  | 0.061906000  | 1.150815000  | 1.166430000  |
| 1  | -1.070469000 | 2.101016000  | 0.206885000  |
| 1  | 3.584256000  | 3.889562000  | 0.735604000  |
| 1  | 3.632304000  | 2.719647000  | -0.591849000 |
| 1  | 2.580385000  | 4.137304000  | -0.727356000 |
| 1  | 5.755056000  | -1.154368000 | -0.992619000 |
| 1  | 4.974740000  | -2.631230000 | -0.363254000 |
| 1  | 4.636831000  | -2.103191000 | -2.005638000 |

**Table S14.** Optimized structure of  ${}^4\text{C}_1$  X=F CAM-B3LYP-D3BJ/Def2TZVP in  $\text{CHCl}_3$  (PCM)

|   |              |              |              |
|---|--------------|--------------|--------------|
| 6 | -0.423988000 | -0.152866000 | -0.016781000 |
| 6 | -0.485584000 | 1.293242000  | 0.448339000  |
| 6 | 0.891114000  | 1.728572000  | 0.893389000  |
| 6 | 1.952227000  | 1.466915000  | -0.150897000 |
| 6 | 1.865396000  | 0.025106000  | -0.635892000 |
| 8 | 0.578661000  | -0.334008000 | -1.007095000 |
| 6 | -1.709691000 | -0.620132000 | -0.657609000 |
| 8 | -2.718313000 | -0.535360000 | 0.347822000  |
| 9 | -0.930217000 | 2.101965000  | -0.585095000 |
| 9 | 0.885757000  | 3.066611000  | 1.234126000  |
| 9 | 1.763120000  | 2.288164000  | -1.245333000 |
| 8 | 2.333823000  | -0.776782000 | 0.441184000  |
| 6 | -3.956439000 | -0.904513000 | -0.016976000 |
| 6 | -4.928617000 | -0.738850000 | 1.106102000  |
| 8 | -4.213339000 | -1.308379000 | -1.118765000 |
| 6 | 2.890320000  | -1.976537000 | 0.127352000  |
| 6 | 3.266960000  | -2.725115000 | 1.361896000  |
| 8 | 3.041660000  | -2.344241000 | -1.000990000 |
| 1 | -0.208738000 | -0.776287000 | 0.856258000  |
| 1 | -1.197465000 | 1.392371000  | 1.267656000  |
| 1 | 1.151217000  | 1.153880000  | 1.785456000  |
| 1 | 2.945158000  | 1.668161000  | 0.249886000  |
| 1 | 2.489534000  | -0.120655000 | -1.512695000 |
| 1 | -1.970056000 | 0.008571000  | -1.506497000 |
| 1 | -1.601542000 | -1.647439000 | -0.999813000 |
| 1 | -4.577742000 | -1.277059000 | 1.985403000  |
| 1 | -5.000135000 | 0.315902000  | 1.370802000  |
| 1 | -5.902927000 | -1.108869000 | 0.804192000  |
| 1 | 3.926872000  | -2.115542000 | 1.977655000  |
| 1 | 2.370895000  | -2.933856000 | 1.946071000  |
| 1 | 3.756857000  | -3.654611000 | 1.091558000  |

**Table S15.** Optimized structure of  ${}^4C_1$  X=Cl CAM-B3LYP-D3BJ/Def2TZVP in  $CHCl_3$  (PCM)

|    |              |              |              |
|----|--------------|--------------|--------------|
| 6  | -0.328161000 | -0.301660000 | 0.015097000  |
| 6  | -0.496769000 | 1.116955000  | 0.551749000  |
| 6  | 0.862192000  | 1.596235000  | 1.024943000  |
| 6  | 1.960345000  | 1.434893000  | -0.003581000 |
| 6  | 1.940302000  | 0.028325000  | -0.588866000 |
| 8  | 0.670953000  | -0.364426000 | -0.989132000 |
| 6  | -1.569148000 | -0.893839000 | -0.607323000 |
| 8  | -2.584898000 | -0.848884000 | 0.392489000  |
| 17 | -1.230968000 | 2.221363000  | -0.648310000 |
| 9  | 0.809279000  | 2.905562000  | 1.453356000  |
| 9  | 1.789887000  | 2.323352000  | -1.046707000 |
| 8  | 2.445449000  | -0.826344000 | 0.428616000  |
| 6  | -3.802913000 | -1.277843000 | 0.025055000  |
| 6  | -4.789097000 | -1.139044000 | 1.139314000  |
| 8  | -4.033748000 | -1.707768000 | -1.072554000 |
| 6  | 3.061446000  | -1.970761000 | 0.029876000  |
| 6  | 3.479879000  | -2.785656000 | 1.207609000  |
| 8  | 3.228426000  | -2.247879000 | -1.121813000 |
| 1  | -0.034665000 | -0.923131000 | 0.867511000  |
| 1  | -1.184970000 | 1.098883000  | 1.391725000  |
| 1  | 1.134822000  | 0.979197000  | 1.885513000  |
| 1  | 2.931540000  | 1.635681000  | 0.447620000  |
| 1  | 2.570752000  | -0.023849000 | -1.471655000 |
| 1  | -1.875039000 | -0.325276000 | -1.482435000 |
| 1  | -1.377022000 | -1.922823000 | -0.905687000 |
| 1  | -4.419053000 | -1.644207000 | 2.030254000  |
| 1  | -4.911734000 | -0.084133000 | 1.383997000  |
| 1  | -5.742888000 | -1.559879000 | 0.838445000  |
| 1  | 4.112050000  | -2.189281000 | 1.864080000  |
| 1  | 2.598340000  | -3.079777000 | 1.776906000  |
| 1  | 4.013911000  | -3.668027000 | 0.871064000  |



**Table S16.** Optimized structure of  ${}^4C_1$  X=Br CAM-B3LYP-D3BJ/Def2TZVP in  $CHCl_3$  (PCM)

|    |              |              |              |
|----|--------------|--------------|--------------|
| 6  | 0.092701000  | 0.589197000  | 0.061462000  |
| 6  | 0.435905000  | -0.750033000 | 0.704518000  |
| 6  | -0.857008000 | -1.377172000 | 1.186869000  |
| 6  | -1.944522000 | -1.433419000 | 0.135406000  |
| 6  | -2.094979000 | -0.081692000 | -0.551463000 |
| 8  | -0.878526000 | 0.446687000  | -0.961295000 |
| 6  | 1.253726000  | 1.314945000  | -0.573738000 |
| 8  | 2.243406000  | 1.460859000  | 0.442081000  |
| 35 | 1.453642000  | -1.926181000 | -0.476946000 |
| 9  | -0.645507000 | -2.634655000 | 1.710563000  |
| 9  | -1.638964000 | -2.364471000 | -0.837371000 |
| 8  | -2.731446000 | 0.768111000  | 0.393493000  |
| 6  | 3.410514000  | 2.006944000  | 0.064633000  |
| 6  | 4.379585000  | 2.060835000  | 1.200982000  |
| 8  | 3.613929000  | 2.388672000  | -1.055907000 |
| 6  | -3.479615000 | 1.792179000  | -0.096232000 |
| 6  | -4.028260000 | 2.624992000  | 1.013430000  |
| 8  | -3.652092000 | 1.964373000  | -1.267337000 |
| 1  | -0.309313000 | 1.218342000  | 0.863075000  |
| 1  | 1.096212000  | -0.582899000 | 1.548914000  |
| 1  | -1.230201000 | -0.745012000 | 1.998095000  |
| 1  | -2.890721000 | -1.726633000 | 0.588929000  |
| 1  | -2.705471000 | -0.176333000 | -1.444721000 |
| 1  | 1.654063000  | 0.751385000  | -1.413127000 |
| 1  | 0.928499000  | 2.291233000  | -0.928783000 |
| 1  | 3.937972000  | 2.594187000  | 2.041610000  |
| 1  | 4.604732000  | 1.047821000  | 1.533581000  |
| 1  | 5.291202000  | 2.555030000  | 0.881580000  |
| 1  | -4.606018000 | 1.999867000  | 1.692975000  |
| 1  | -3.206212000 | 3.057950000  | 1.582876000  |
| 1  | -4.652420000 | 3.413258000  | 0.605897000  |

**Table S17.** Optimized structure of  ${}^4C_1$  X=I CAM-B3LYP-D3BJ/Def2TZVP in  $CHCl_3$  (PCM)

|    |              |              |              |
|----|--------------|--------------|--------------|
| 6  | -0.225726000 | 0.790986000  | 0.097001000  |
| 6  | 0.326124000  | -0.442357000 | 0.803424000  |
| 6  | -0.858147000 | -1.245470000 | 1.303695000  |
| 6  | -1.902930000 | -1.529128000 | 0.245506000  |
| 6  | -2.255468000 | -0.259919000 | -0.520036000 |
| 8  | -1.132863000 | 0.442924000  | -0.935775000 |
| 6  | 0.799350000  | 1.694376000  | -0.543941000 |
| 8  | 1.736492000  | 2.030178000  | 0.476446000  |
| 53 | 1.709711000  | -1.590985000 | -0.385504000 |
| 9  | -0.462084000 | -2.427400000 | 1.894970000  |
| 9  | -1.430071000 | -2.448682000 | -0.670697000 |
| 8  | -3.052986000 | 0.520162000  | 0.360613000  |
| 6  | 2.806290000  | 2.745580000  | 0.093808000  |
| 6  | 3.744297000  | 2.974981000  | 1.234253000  |
| 8  | 2.959894000  | 3.127118000  | -1.034695000 |
| 6  | -3.947282000 | 1.374346000  | -0.204055000 |
| 6  | -4.662271000 | 2.161533000  | 0.842399000  |
| 8  | -4.109969000 | 1.451223000  | -1.386725000 |
| 1  | -0.754134000 | 1.368070000  | 0.864309000  |
| 1  | 0.928763000  | -0.126351000 | 1.648251000  |
| 1  | -1.344470000 | -0.644563000 | 2.078356000  |
| 1  | -2.798513000 | -1.948197000 | 0.702892000  |
| 1  | -2.815408000 | -0.503872000 | -1.418089000 |
| 1  | 1.302050000  | 1.193251000  | -1.368211000 |
| 1  | 0.314630000  | 2.592287000  | -0.923367000 |
| 1  | 3.206433000  | 3.385147000  | 2.087352000  |
| 1  | 4.174100000  | 2.021301000  | 1.540977000  |
| 1  | 4.536004000  | 3.650459000  | 0.927218000  |
| 1  | -5.124717000 | 1.487436000  | 1.561957000  |
| 1  | -3.945469000 | 2.779451000  | 1.382865000  |
| 1  | -5.414492000 | 2.790088000  | 0.377499000  |

**Table S18.** Optimized structure of  ${}^1\text{C}_4 \text{X}=\text{F}$  CAM-B3LYP-D3BJ/Def2TZVP in  $\text{CHCl}_3$  (PCM)

|   |              |              |              |
|---|--------------|--------------|--------------|
| 6 | -2.414879000 | 0.363537000  | -0.898895000 |
| 6 | -2.518402000 | -0.587026000 | 0.275967000  |
| 6 | -1.477364000 | -1.679996000 | 0.148070000  |
| 6 | -0.102855000 | -1.071876000 | -0.052701000 |
| 8 | -0.138824000 | -0.251584000 | -1.191660000 |
| 6 | -0.992494000 | 0.880851000  | -1.113449000 |
| 6 | -0.536427000 | 1.909699000  | -0.094553000 |
| 9 | -3.290136000 | 1.418038000  | -0.710557000 |
| 9 | -2.288459000 | 0.107813000  | 1.456426000  |
| 9 | -1.492479000 | -2.456179000 | 1.287761000  |
| 8 | 0.783727000  | 2.305123000  | -0.460944000 |
| 8 | 1.489528000  | 2.113356000  | 1.659870000  |
| 6 | 1.726404000  | 2.310866000  | 0.498281000  |
| 6 | 3.079981000  | 2.567377000  | -0.076900000 |
| 8 | 0.788700000  | -2.114429000 | -0.331765000 |
| 8 | 2.519843000  | -0.784715000 | 0.189631000  |
| 6 | 2.111340000  | -1.848976000 | -0.176483000 |
| 6 | 2.934917000  | -3.043471000 | -0.521944000 |
| 1 | -2.724815000 | -0.170306000 | -1.798692000 |
| 1 | -3.520649000 | -1.009335000 | 0.346049000  |
| 1 | -1.707419000 | -2.318866000 | -0.706399000 |
| 1 | 0.232031000  | -0.526278000 | 0.830609000  |
| 1 | -0.931537000 | 1.334078000  | -2.101604000 |
| 1 | -0.536104000 | 1.538797000  | 0.923897000  |
| 1 | -1.189908000 | 2.779128000  | -0.144296000 |
| 1 | 3.751981000  | 2.909724000  | 0.704087000  |
| 1 | 3.451063000  | 1.623048000  | -0.476586000 |
| 1 | 3.030509000  | 3.289390000  | -0.888421000 |
| 1 | 3.984064000  | -2.825892000 | -0.351587000 |
| 1 | 2.622349000  | -3.894010000 | 0.082342000  |
| 1 | 2.772975000  | -3.304455000 | -1.567474000 |

**Table S19.** Optimized structure of  ${}^1\text{C}_4$   $\text{X}=\text{Cl}$  CAM-B3LYP-D3BJ/Def2TZVP in  $\text{CHCl}_3$  (PCM)

|    |              |              |              |
|----|--------------|--------------|--------------|
| 6  | -2.240092000 | -0.291458000 | -0.765819000 |
| 6  | -2.054962000 | -1.243789000 | 0.399725000  |
| 6  | -0.775839000 | -2.038172000 | 0.210653000  |
| 6  | 0.394137000  | -1.109288000 | -0.041494000 |
| 8  | 0.101360000  | -0.313582000 | -1.160381000 |
| 6  | -1.000244000 | 0.572768000  | -1.016506000 |
| 6  | -0.739128000 | 1.664764000  | 0.007132000  |
| 17 | -3.718063000 | 0.686361000  | -0.559176000 |
| 9  | -1.956175000 | -0.533818000 | 1.587914000  |
| 9  | -0.544915000 | -2.796107000 | 1.339234000  |
| 8  | 0.439377000  | 2.348765000  | -0.412617000 |
| 8  | 1.223005000  | 2.400413000  | 1.687837000  |
| 6  | 1.374958000  | 2.615188000  | 0.514971000  |
| 6  | 2.608334000  | 3.179951000  | -0.108619000 |
| 8  | 1.499637000  | -1.897288000 | -0.383549000 |
| 8  | 2.878677000  | -0.201236000 | 0.125244000  |
| 6  | 2.723930000  | -1.321742000 | -0.267538000 |
| 6  | 3.795648000  | -2.267841000 | -0.692427000 |
| 1  | -2.401252000 | -0.891621000 | -1.658596000 |
| 1  | -2.908367000 | -1.913671000 | 0.497343000  |
| 1  | -0.880224000 | -2.712936000 | -0.640517000 |
| 1  | 0.628686000  | -0.506673000 | 0.837019000  |
| 1  | -1.098828000 | 1.042014000  | -1.993846000 |
| 1  | -0.604682000 | 1.287822000  | 1.014743000  |
| 1  | -1.568851000 | 2.368366000  | 0.012511000  |
| 1  | 3.197812000  | 3.693922000  | 0.644410000  |
| 1  | 3.187319000  | 2.345955000  | -0.506451000 |
| 1  | 2.360637000  | 3.849550000  | -0.928802000 |
| 1  | 4.768087000  | -1.811483000 | -0.540231000 |
| 1  | 3.718484000  | -3.193274000 | -0.123532000 |
| 1  | 3.661168000  | -2.515639000 | -1.745132000 |

**Table S20.** Optimized structure of  ${}^1\text{C}_4$   $\text{X}=\text{Br}$  CAM-B3LYP-D3BJ/Def2TZVP in  $\text{CHCl}_3$  (PCM)

|    |              |              |              |
|----|--------------|--------------|--------------|
| 6  | -1.783743000 | -0.566329000 | -0.633019000 |
| 6  | -1.451764000 | -1.501210000 | 0.511714000  |
| 6  | -0.103576000 | -2.153339000 | 0.258828000  |
| 6  | 0.948798000  | -1.103645000 | -0.032980000 |
| 8  | 0.524165000  | -0.335470000 | -1.128434000 |
| 6  | -0.657916000 | 0.429230000  | -0.924834000 |
| 6  | -0.460249000 | 1.533878000  | 0.099784000  |
| 35 | -3.502416000 | 0.302524000  | -0.350005000 |
| 9  | -1.376305000 | -0.796635000 | 1.704948000  |
| 9  | 0.255851000  | -2.889211000 | 1.368047000  |
| 8  | 0.627146000  | 2.331537000  | -0.362490000 |
| 8  | 1.463690000  | 2.487044000  | 1.711825000  |
| 6  | 1.557092000  | 2.704635000  | 0.533322000  |
| 6  | 2.705055000  | 3.388737000  | -0.132433000 |
| 8  | 2.115624000  | -1.767163000 | -0.431334000 |
| 8  | 3.329433000  | 0.059562000  | 0.044651000  |
| 6  | 3.276867000  | -1.067832000 | -0.355523000 |
| 6  | 4.423947000  | -1.893500000 | -0.831569000 |
| 1  | -1.923955000 | -1.169761000 | -1.525612000 |
| 1  | -2.220800000 | -2.262180000 | 0.637076000  |
| 1  | -0.173815000 | -2.830115000 | -0.594368000 |
| 1  | 1.156912000  | -0.486266000 | 0.841922000  |
| 1  | -0.847226000 | 0.893599000  | -1.890943000 |
| 1  | -0.246445000 | 1.164319000  | 1.096427000  |
| 1  | -1.352739000 | 2.153892000  | 0.149754000  |
| 1  | 3.259279000  | 3.970268000  | 0.597910000  |
| 1  | 3.356301000  | 2.615548000  | -0.541297000 |
| 1  | 2.363832000  | 4.019388000  | -0.949905000 |
| 1  | 5.347718000  | -1.335641000 | -0.719703000 |
| 1  | 4.471282000  | -2.821395000 | -0.263288000 |
| 1  | 4.270751000  | -2.155228000 | -1.878260000 |

**Table S21.** Optimized structure of  ${}^1\text{C}_4$  X=I CAM-B3LYP-D3BJ/Def2TZVP in  $\text{CHCl}_3$  (PCM)

|    |              |              |              |
|----|--------------|--------------|--------------|
| 6  | -1.376478000 | -0.666741000 | -0.575036000 |
| 6  | -0.978547000 | -1.596905000 | 0.551941000  |
| 6  | 0.391373000  | -2.188989000 | 0.266546000  |
| 6  | 1.392035000  | -1.095074000 | -0.040402000 |
| 8  | 0.913331000  | -0.340731000 | -1.122406000 |
| 6  | -0.296538000 | 0.372803000  | -0.887257000 |
| 6  | -0.111813000 | 1.479311000  | 0.138171000  |
| 53 | -3.318580000 | 0.186774000  | -0.242151000 |
| 9  | -0.906935000 | -0.902476000 | 1.753018000  |
| 9  | 0.805946000  | -2.916296000 | 1.362622000  |
| 8  | 0.937959000  | 2.314833000  | -0.343070000 |
| 8  | 1.790517000  | 2.520848000  | 1.720027000  |
| 6  | 1.860837000  | 2.734200000  | 0.539098000  |
| 6  | 2.969517000  | 3.464021000  | -0.144564000 |
| 8  | 2.578699000  | -1.706474000 | -0.464274000 |
| 8  | 3.725910000  | 0.161912000  | 0.015180000  |
| 6  | 3.712264000  | -0.963086000 | -0.395137000 |
| 6  | 4.885681000  | -1.739462000 | -0.889727000 |
| 1  | -1.512739000 | -1.269338000 | -1.468719000 |
| 1  | -1.706864000 | -2.395166000 | 0.687599000  |
| 1  | 0.330041000  | -2.863060000 | -0.589467000 |
| 1  | 1.591485000  | -0.473943000 | 0.833842000  |
| 1  | -0.524143000 | 0.834716000  | -1.846290000 |
| 1  | 0.134932000  | 1.111802000  | 1.128114000  |
| 1  | -1.021842000 | 2.070943000  | 0.212484000  |
| 1  | 3.508368000  | 4.071324000  | 0.576249000  |
| 1  | 3.647395000  | 2.718164000  | -0.560715000 |
| 1  | 2.590216000  | 4.076822000  | -0.958851000 |
| 1  | 5.786369000  | -1.142296000 | -0.793591000 |
| 1  | 4.982189000  | -2.662690000 | -0.319873000 |
| 1  | 4.726922000  | -2.010925000 | -1.933006000 |

## VI. NMR spectra of compounds

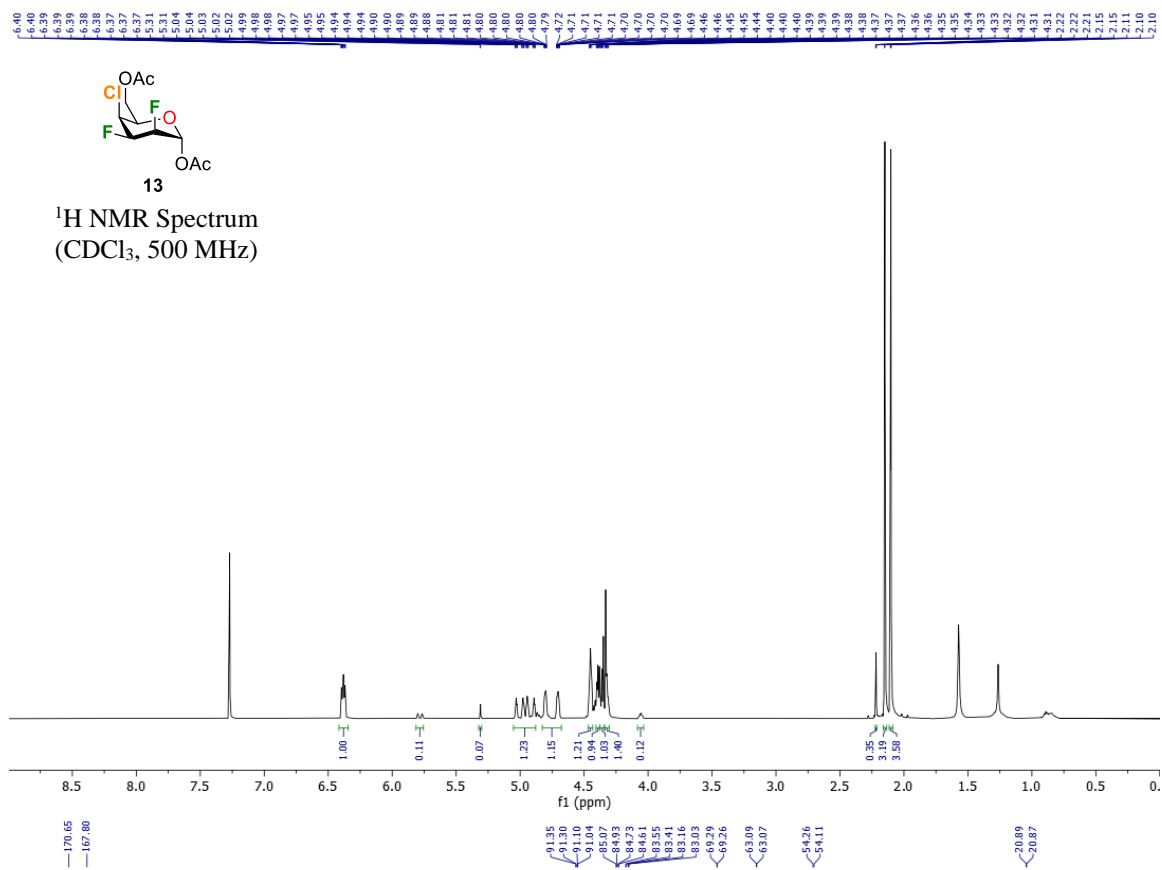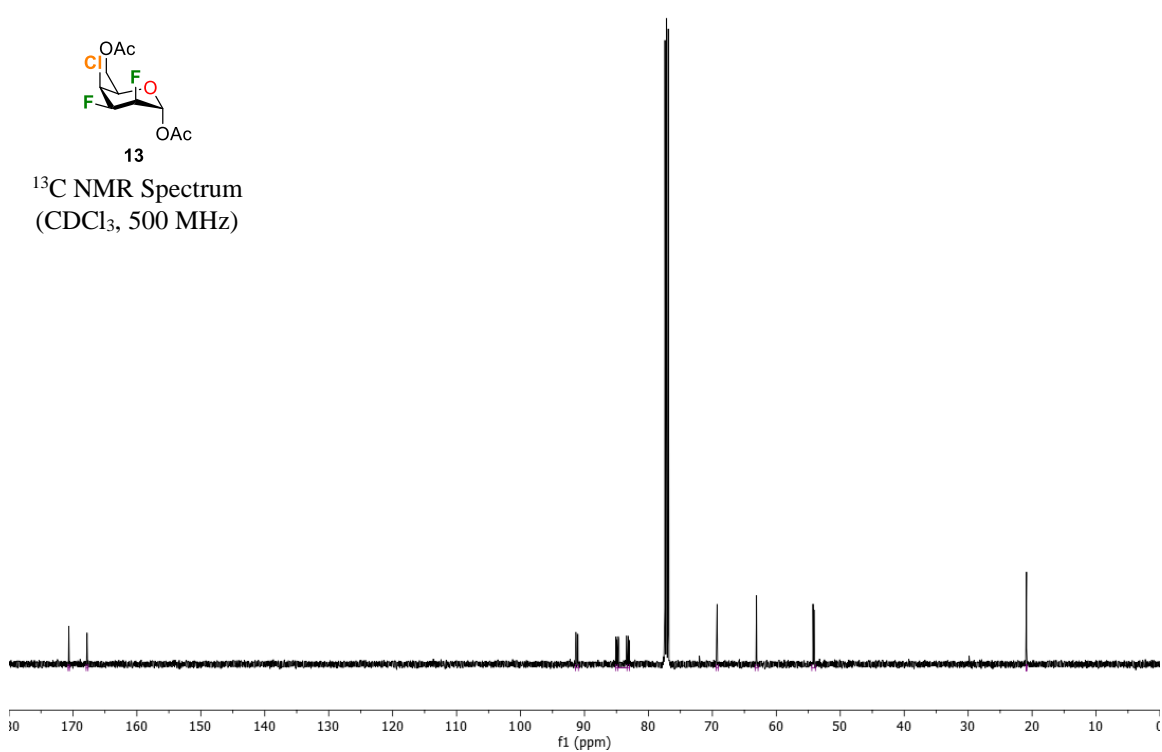

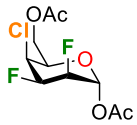

<sup>19</sup>F NMR Spectrum  
(CDCl<sub>3</sub>, 500 MHz)

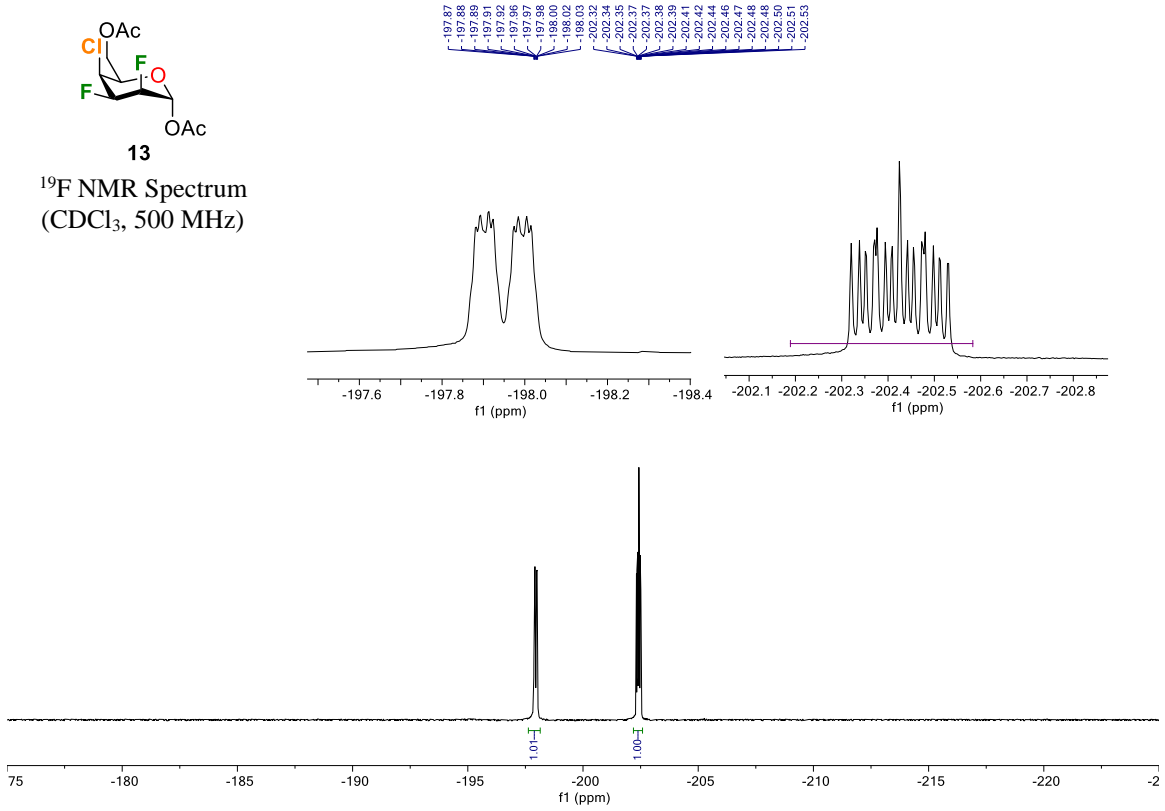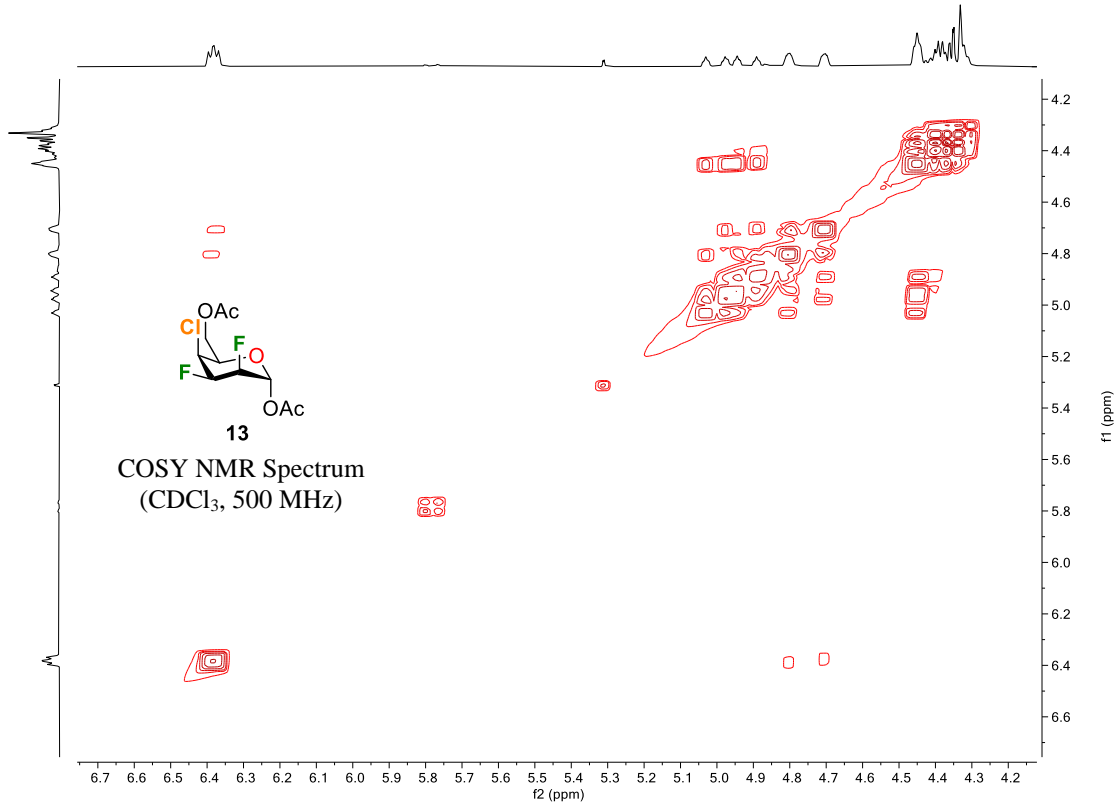



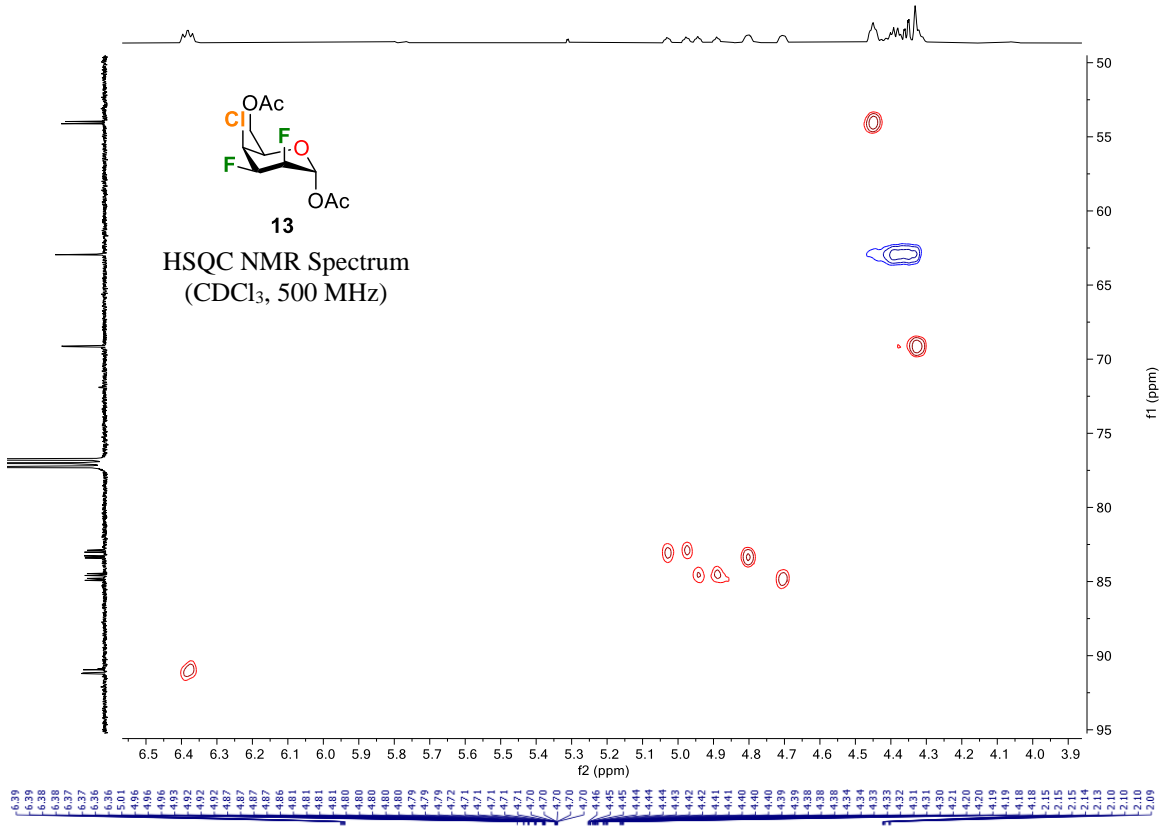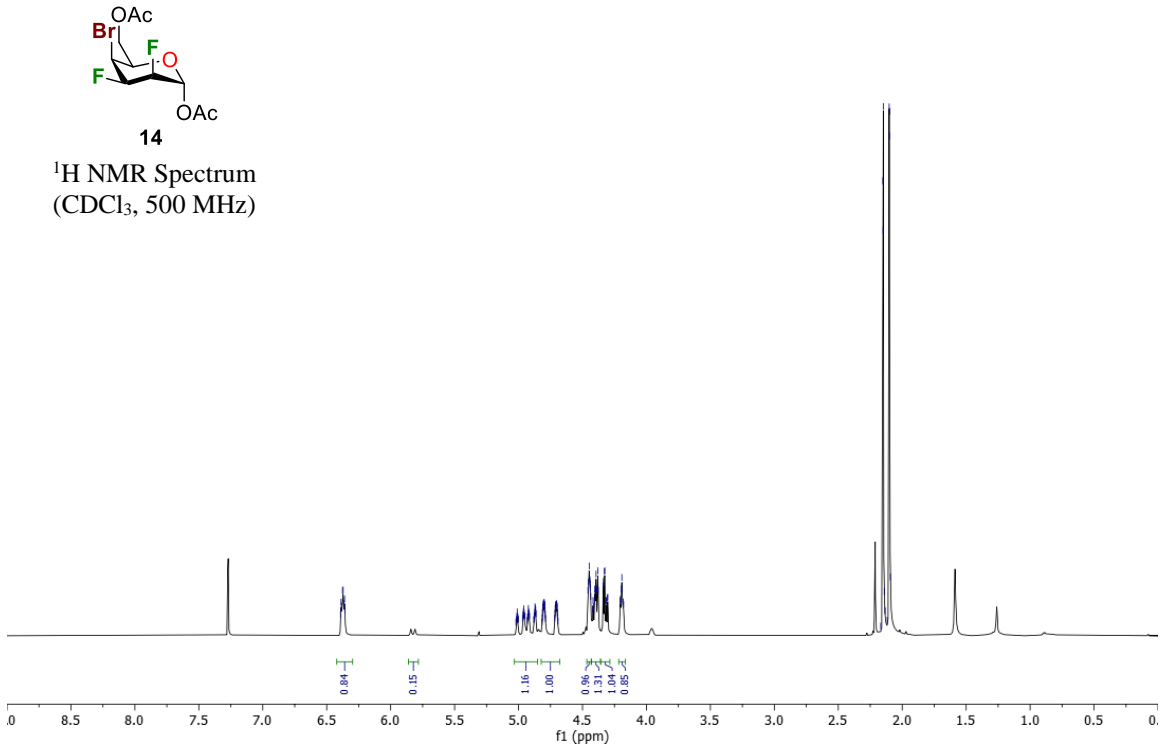

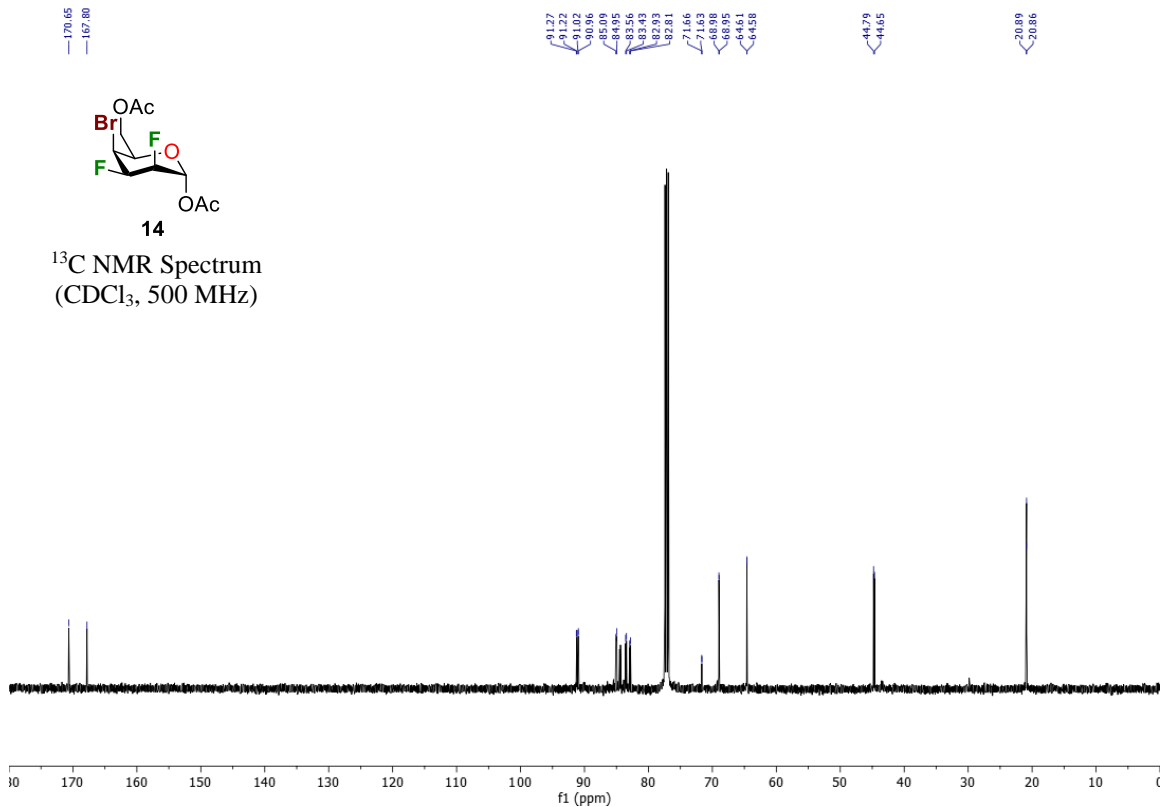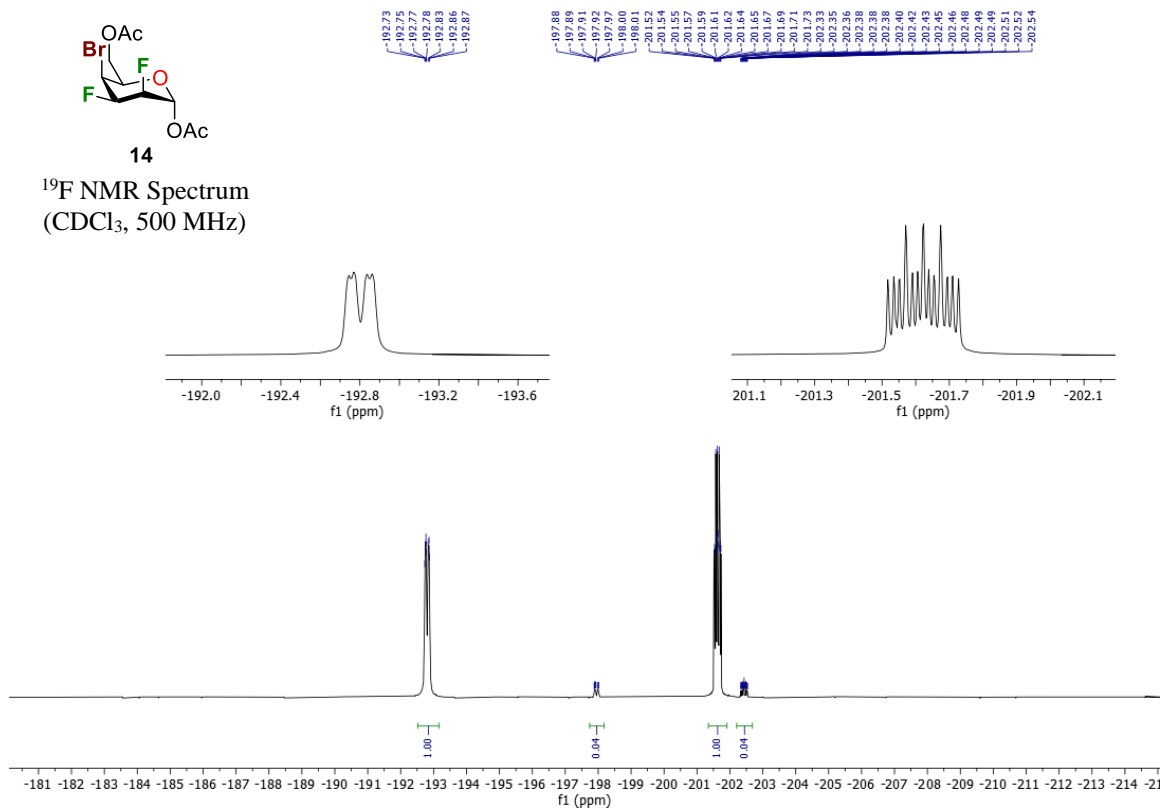

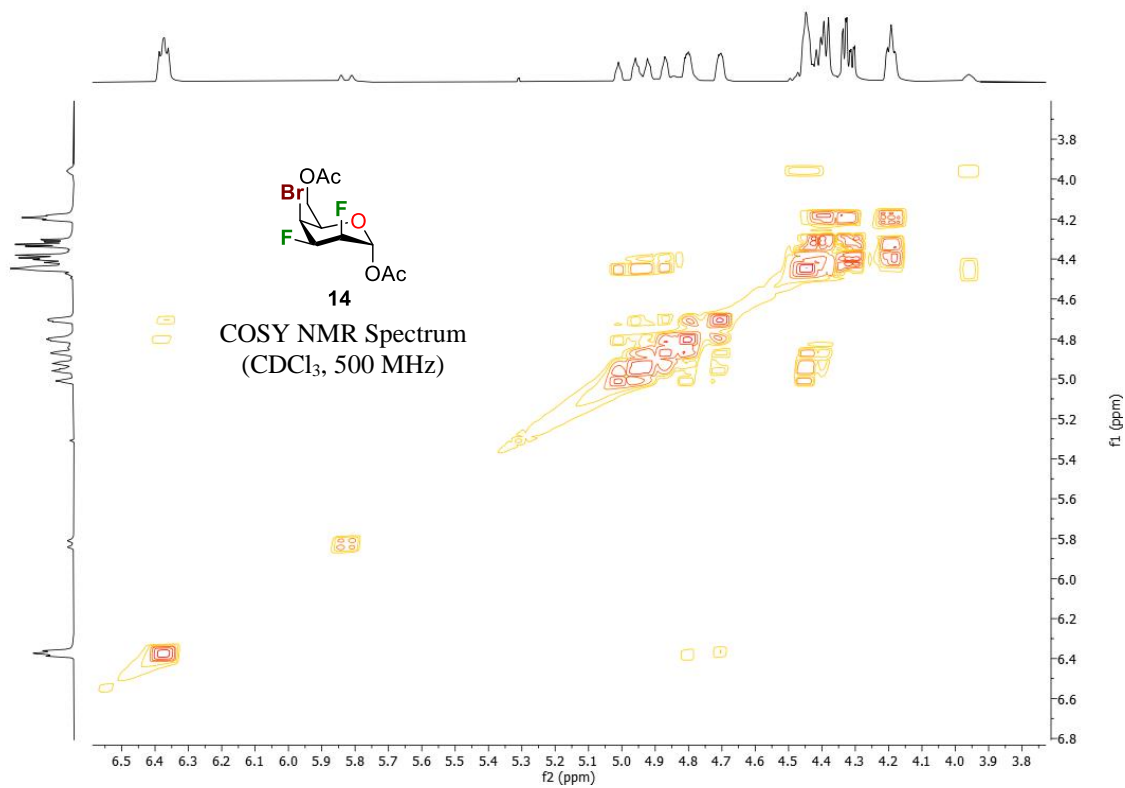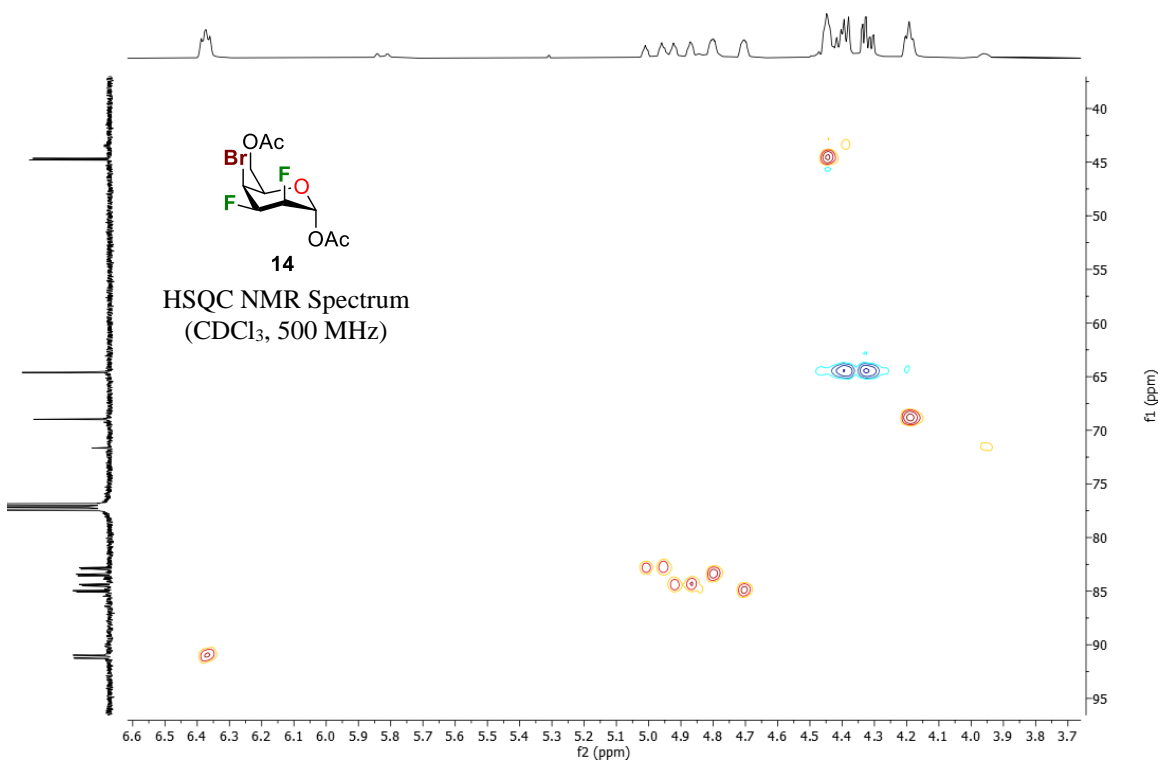

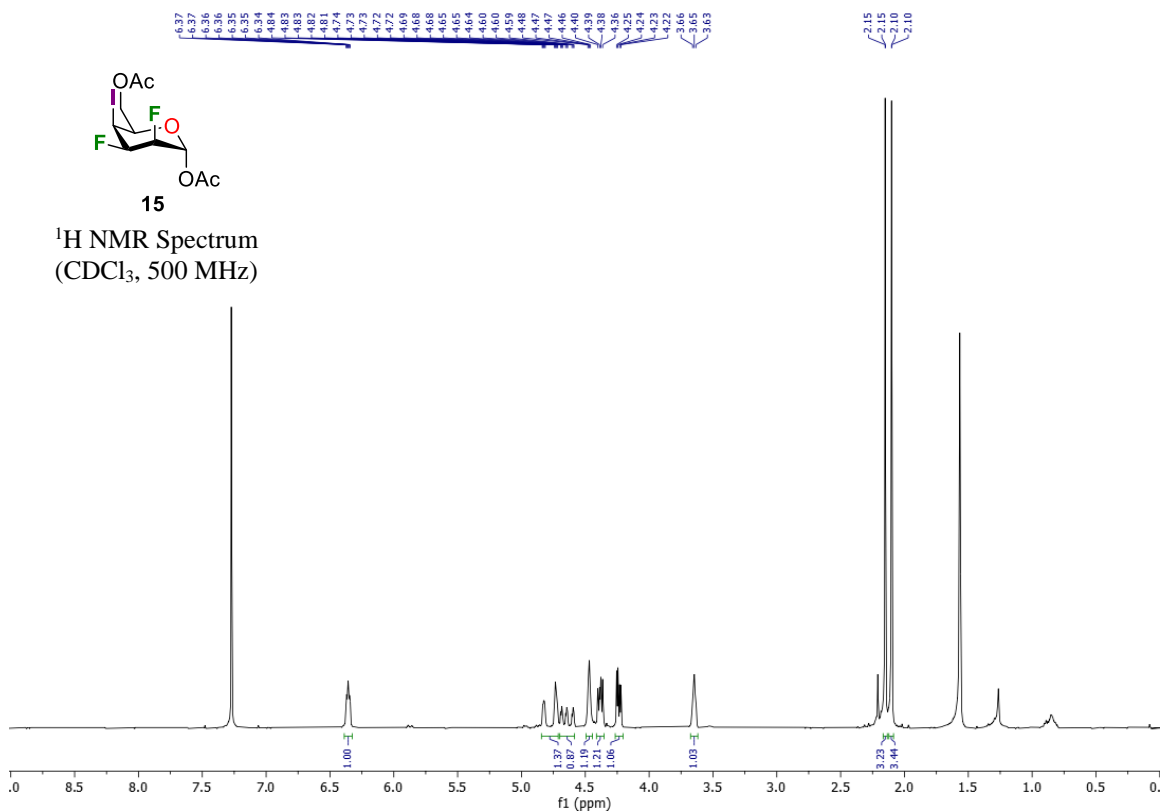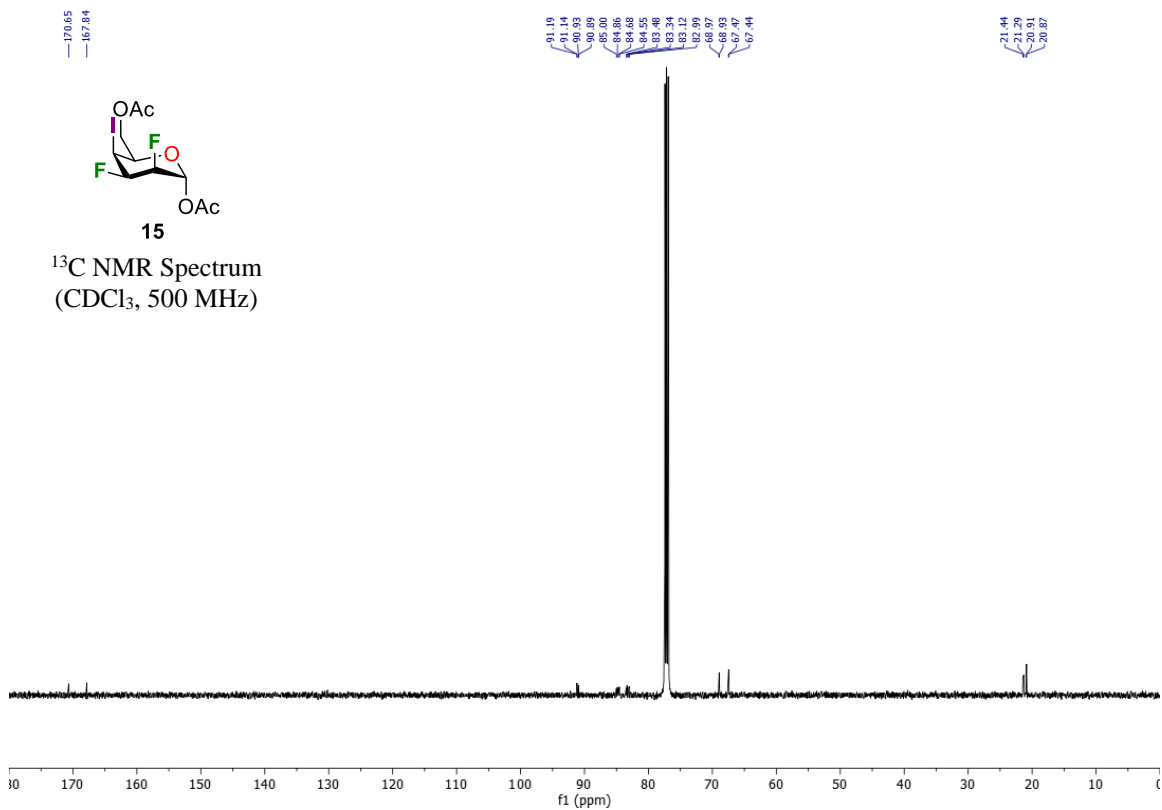

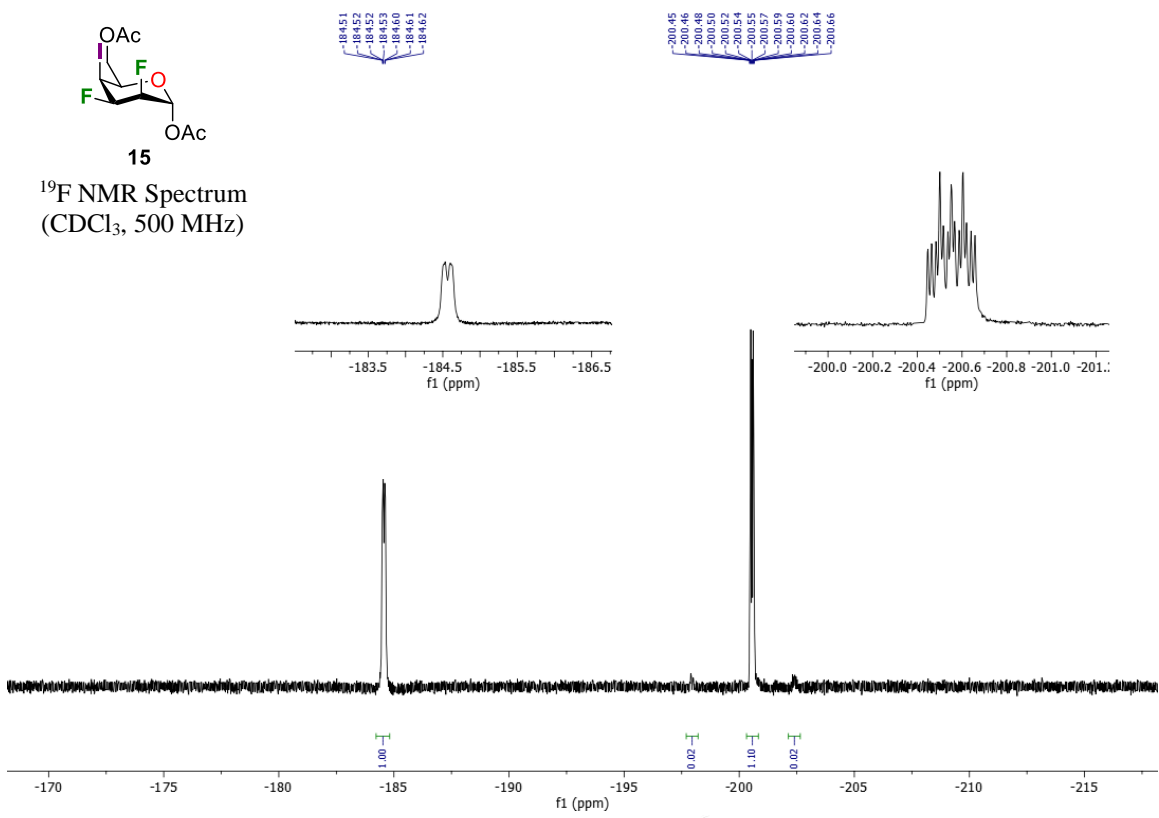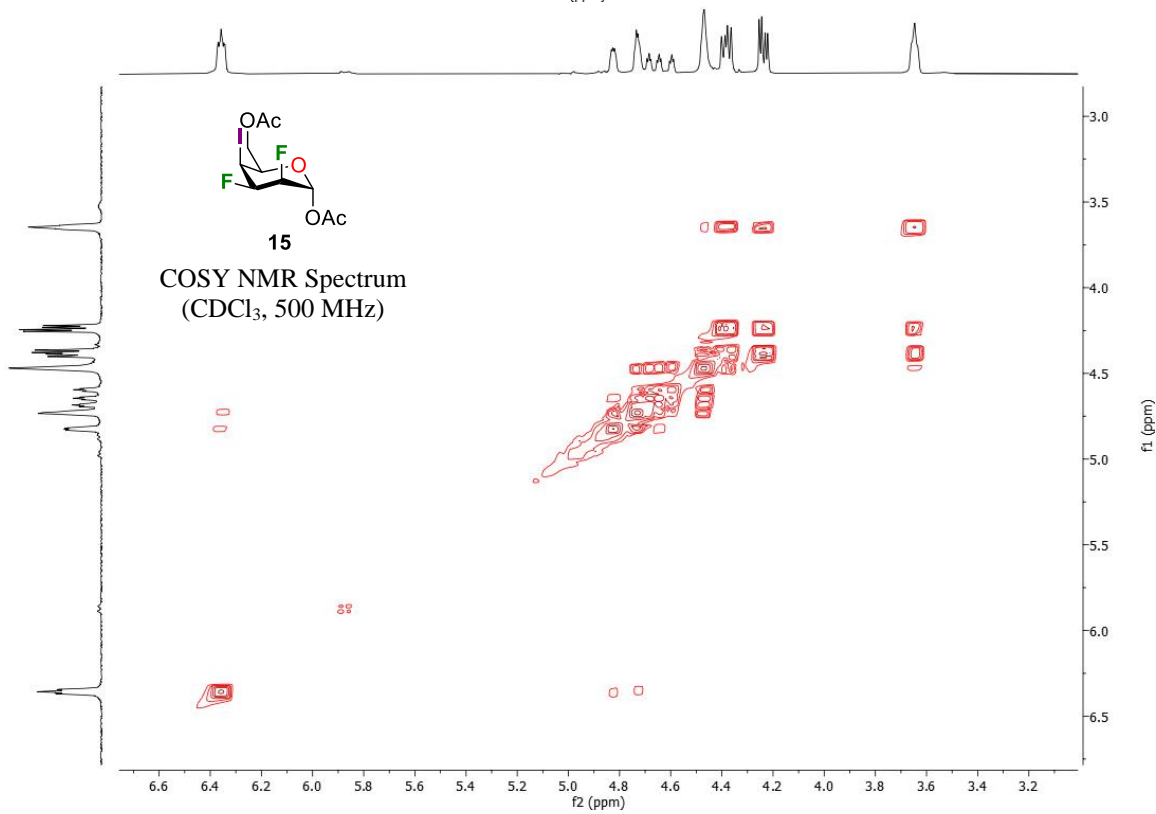

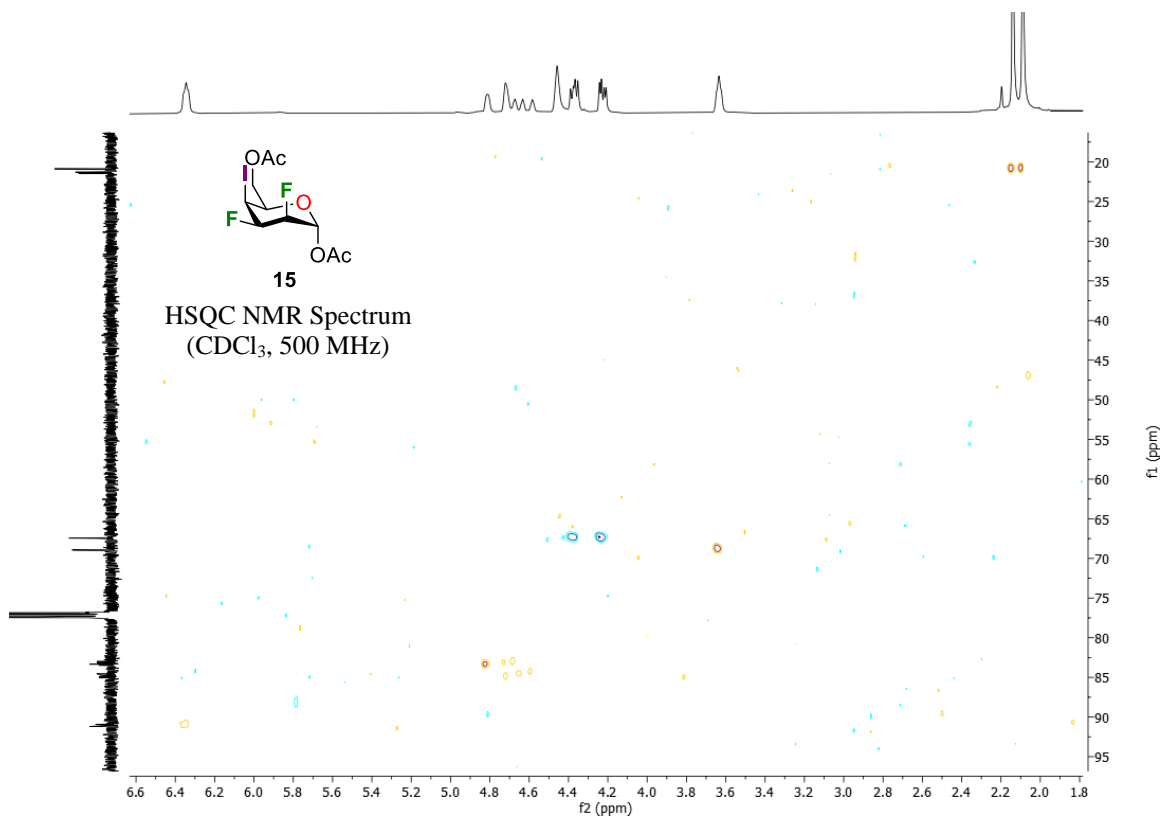

## VII. References

---

- <sup>1</sup> Denavit, V.; Lainé, D.; St-Gelais, J.; Johnson, P. A.; Giguère, D. *Nat. Commun.* **2018**, *9*, 4721. doi:10.1038/s41467-018-06901-y
- <sup>2</sup> Lessard, O.; Lainé, D.; Fecteau, C.-É.; Johnson, P. A.; Giguère, D. *Org. Chem. Front.* **2022**, *9*, 6566–6572. doi:10.1039/D2QO01433E
- <sup>3</sup> Gaussian 16, Revision B.01, M. J. Frisch, G. W. Trucks, H. B. Schlegel, G. E. Scuseria, M. A. Robb, J. R. Cheeseman, G. Scalmani, V. Barone, G. A. Petersson, H. Nakatsuji, X. Li, M. Caricato, A. V. Marenich, J. Bloino, B. G. Janesko, R. Gomperts, B. Mennucci, H. P. Hratchian, J. V. Ortiz, A. F. Izmaylov, J. L. Sonnenberg, D. Williams-Young, F. Ding, F. Lipparini, F. Egidi, J. Goings, B. Peng, A. Petrone, T. Henderson, D. Ranasinghe, V. G. Zakrzewski, J. Gao, N. Rega, G. Zheng, W. Liang, M. Hada, M. Ehara, K. Toyota, R. Fukuda, J. Hasegawa, M. Ishida, T. Nakajima, Y. Honda, O. Kitao, H. Nakai, T. Vreven, K. Throssell, J. A. Montgomery, Jr., J. E. Peralta, F. Ogliaro, M. J. Bearpark, J. J. Heyd, E. N. Brothers, K. N. Kudin, V. N. Staroverov, T. A. Keith, R. Kobayashi, J. Normand, K. Raghavachari, A. P. Rendell, J. C. Burant, S. S. Iyengar, J. Tomasi, M. Cossi, J. M. Millam, M. Klene, C. Adamo, R. Cammi, J. W. Ochterski, R. L. Martin, K. Morokuma, O. Farkas, J. B. Foresman, and D. J. Fox Gaussian 16, Revision B.01, Gaussian, Inc., Wallingford CT, 2016.
- <sup>4</sup> Becke, A. D. *J. Chem. Phys.* **1993**, *98*, 5648–5652. doi:10.1063/1.464913
- <sup>5</sup> Lee, C.; Yang, W. Parr, R. G. *Phys. Rev. B* **1988**, *37*, 785–789. doi:10.1103/physrevb.37.785
- <sup>6</sup> Yanai, T.; Tew, D.; Handy, N. *Chem. Phys. Lett.* **2004**, *393*, 51–57. doi:10.1016/j.cplett.2004.06.011
- <sup>7</sup> Weigend, F.; Ahlrichs, R. *Phys. Chem. Chem. Phys.* **2005**, *7*, 3297–3305. doi:10.1039/b508541a
- <sup>8</sup> a) Grimme, S.; Antony, J.; Ehrlich, S.; Krieg, H. *J. Chem. Phys.* **2010**, *132*, 154104. doi:10.1063/1.3382344
- <sup>9</sup> Grimme, S.; Ehrlich, S.; Goerigk, L. *J. Comp. Chem.* **2011**, *32*, 1456–1465. doi:10.1002/jcc.21759
- <sup>10</sup> Becke, A. D.; Johnson, E. R. *J. Chem. Phys.* **2006**, *124*, 014104. doi:10.1063/1.2139668

---

<sup>11</sup> Tomasi, J.; Mennucci, B.; Cammi, R. *Chem. Rev.* **2005**, *105*, 2999–3093.  
doi:10.1021/cr9904009.
